# Supplementary material for: Characterisation of secretome-based immune responses of human leukocytes infected with various Mycobacterium tuberculosis lineages
Source: PeerJ. 2021 Jun 3;9:e11565. doi: 10.7717/peerj.11565 (PMC8180191; doi:10.7717/peerj.11565)
Supplement: Supplemental Information 1 [file peerj-09-11565-s001.xlsx]

## Sheet: Table S1
Table S1 Genotypic characteristics of the three strains used, each representing one of the three main lineages of M. tuberculosis
Sample number	Specimen type					Large sequence polymorphisms (RD-Analyzer)			Spoligotyping
		INH	RIF	ETH	STM	RD deleted	Main lineage	Sublineage	Octal code	Spoligotype
15177	sputum	S	S	S	S	RD105, RD207, RD181 and RD150	East Asian	Lineage 2.2.1.1	000000000003771	Beijing
15561	sputum	S	S	S	S	RD239	Indo-Oceanic	Lineage 1	777777777413771	EAI5
19477	sputum	S	S	S	S	RD122 and pks15/1	Euro-American	Lineage 4.5	777777777760731	T2
Note: S= susceptible, INH=isoniazid, RIF=rifampicin, ETH=ethambutol, STM=streptomycin, RD= region of differences
