# Supplementary material for: Characterisation of secretome-based immune responses of human leukocytes infected with various Mycobacterium tuberculosis lineages
Source: PeerJ. 2021 Jun 3;9:e11565. doi: 10.7717/peerj.11565 (PMC8180191; doi:10.7717/peerj.11565)
Supplement: Supplemental Information 3 [file peerj-09-11565-s003.xlsx]

## Sheet: Table S3
Table S3 List of proteins, classified by experimental stage and M. tuberculosis lineage, detected from leukocytes used in the experiments.
East-Asian (EA) lineage	GI numbers	Peptides	Gene symbols	Ensembl Gene ID	Mass (Da)	Mass SD (Da)	Infected Day 1	Uninfected Day 1	Infected Day 5	Uninfected Day 5	Fold change Day 1 infected-uninfected	Fold change Day 5 infected-uninfected
	Clearance markers—qualitative (n = 9): detectable in Day 5 cells only (i.e. after clearance of Mtb)
	gi|112699423	STISRDNSKNVLFLQMNSLR	-	-	2336.07	4.91e-13	0	0	6.94775	0	0	6.94775
	gi|296452942	CATPPQLANGVTEGLDYGFMK	SVEP1	ENSG00000165124	2283.17	0.00560289	0	0	7.57646	0	0	7.57646
	gi|767962174	MGINFHHPGTDNIMALNTR	CPEB3	ENSG00000107864	2156	0	0	0	7.68337	0	0	7.68337
	gi|116242735	GTGSDGPR	PSTK	ENSG00000179988	745.422	0.00131411	0	0	9.04022	0	0	9.04022
	gi|193806337	GKVLAQQGEYSEAIPILRAALK	FKBP8	ENSG00000105701	2356.18	4.91e-13	0	0	9.08649	0	0	9.08649
	gi|181616	FGEVISYQQLAALAGNPKATR	MGMT	ENSG00000170430	2234.04	0.00294733	0	0	12.4392	0	0	12.4392
	gi|768015681	FDVGPK	DIDO1	ENSG00000101191	661.673	0.30505	0	0	12.7894	0	0	12.7894
	gi|768038890	YQHKNQQAK	DOCK11	ENSG00000147251	1142.87	0.815922	0	0	12.8302	0	0	12.8302
	gi|317373419	HGTPRRLLYCQR	MMP14	ENSG00000157227	1554.82	0.00249291	0	0	14.6808	0	0	14.6808
	Clearance markers—quantitative (n = 15): highly expressed in infected Day 5 vs uninfected Day 5 cells, but not highly expressed in infected Day 1 vs uninfected Day1 cells
	gi|119619673	EAMVKLK	GOLGA6B	ENSG00000215186	819.439	1.22e-13	11.1734	14.522	11.1815	0	0.769417	11.1815
	gi|406533031	TAEYMAQCGVDLIIGSHPHVMQRVGK	-	-	2929.83	0.24291	9.64864	11.6544	10.2356	0	0.827898	10.2356
	gi|768013176	GDTSGERGLGCNELGRSLR	-	-	2033.28	0.361571	10.0259	12.0383	10.7599	0	0.832839	10.7599
	gi|363985888	TAEAAEQMKRLDGK	-	-	1567.68	0.461585	12.5456	14.1262	12.9581	0	0.888103	12.9581
	gi|21359894	KLNFQAFAELCRKR	ITPK1	ENSG00000274958; ENSG00000100605	1780.82	0.298104	13.3673	14.6193	13.5646	0	0.914361	13.5646
	gi|530412564	IMNEEDPEKQRR	CCDC47	ENSG00000108588	1559.65	0.911279	12.8864	13.6008	13.2641	0	0.947474	13.2641
	gi|1034572457	SAWSPELFS	-	-	1023.53	1.19e-13	14.1582	14.9027	13.3088	0	0.950041	13.3088
	gi|721363461	AEMQNCSDPMMKLLLDKK	-	-	2183.44	0.500067	13.8245	14.4986	13.8761	0	0.953506	13.8761
	gi|567139	LEQSGGGVVKPGGSLR	-	-	1539.78	0.00869672	15.5206	16.2376	15.5618	0	0.955846	15.5618
	gi|1034671519	VLYSTAMESIQGPGK	-	-	1598.17	0.935341	12.8718	13.4534	12.7488	0	0.956768	12.7488
	gi|406527412	KGAFDGMLQKRR	-	-	1419.7	0	13.9925	14.5297	14.0654	0	0.963028	14.0654
	gi|406525470	VTFGAYDEKNGR	-	-	1357.68	0.00518968	15.1107	15.6621	15.3719	0	0.964797	15.3719
	gi|406516825	KYLADMNPIEAMDFVKDR	-	-	2172.8	0.330694	13.3295	13.6611	13.1704	0	0.975722	13.1704
	gi|406534716	IFRFNPGKELK	-	-	1350.12	0.503794	13.8489	14.1197	13.7245	0	0.980825	13.7245
	gi|1230897427	HIGIIMDGNGR	-	-	1199.6	2.37e-13	10.0226	10.161	9.94888	0	0.986375	9.94888
	Innitial infection markers—qualitative (n = 1): Detectable in infected Day 1 cells only
	gi|119586278	SKFELGK	-	-	807.472	0.00150543	16.5752	0	0	0	16.5752	0
	Innitial infection markers—quantitative (n = 15): highly expressed in infected Day 1 vs uninfected Day 1 cells, but not significantly more highly expressed in infected Day 5 vs uninfected Day 5 cells
	gi|336068135	AMGADYIIGVTVQGPPR	-	-	1744.89	0	17.0139	0	15.0076	16.9775	17.0139	0.883967
	gi|158254420	DSLSDDGVDLKTQPVR	LYN	ENSG00000254087	1745.95	0.226954	10.9279	0	10.6342	11.7505	10.9279	0.905003
	gi|1034560884	IIYNNLGIDEGAWMK	RYR2	ENSG00000198626	1754.18	0.775595	14.3067	0	13.5283	14.9147	14.3067	0.907045
	gi|11514290	VTPFYAVXCNDSK	-	-	1498.91	0.268837	15.6978	0	11.5892	12.7147	15.6978	0.911483
	gi|363986532	TPGLVR	-	-	643.317	0.00268764	16.1631	0	14.8492	16.0078	16.1631	0.927622
	gi|221044476	RYKGHR	DCAF8	ENSG00000132716	816.743	0.00746689	13.8628	0	12.8893	13.6202	13.8628	0.946337
	gi|1034587608	SRAQGCCAGER	-	-	1248.62	0.568302	15.4697	0	13.417	14.0996	15.4697	0.951583
	gi|406513587	TGRKKEVTLGVR	-	-	1344.7	0.0169867	15.1263	0	14.8471	15.4394	15.1263	0.96164
	gi|62088522	SNCSRLSARR	RPL12P16	-	1205.87	0.540536	11.1777	0	11.0479	11.3238	11.1777	0.975631
	gi|406535035	VTHAPR	-	-	679.513	0.00322252	18.3827	0	18.2833	18.6685	18.3827	0.979365
	gi|406545128	INVEPRVKR	-	-	1109.64	0.000595993	12.2901	0	11.7043	11.8953	12.2901	0.983949
	gi|1034698040	FSDPR	-	-	621.82	0.00112535	13.229	0	13.2823	13.37	13.229	0.993444
	gi|17402861	RYAEVDK	SGK3	ENSG00000104205	879.492	1.18e-13	13.8481	0	13.1093	13.128	13.8481	0.998569
	gi|1034609680	ESILSSSPNAGSKR	ZNF541	ENSG00000118156	1431.74	0	13.6605	0	13.2996	13.3123	13.6605	0.999046
	gi|1710614	YCNLMMQRRK	RNASE4	ENSG00000258818	1431.74	0.000634557	13.5297	0	13.5042	13.5135	13.5297	0.999314
	Sustained infection markers—qualitative (n = 10): detectable in infected Day 1 and Day 5 cells but not in uninfected cells
	gi|114152287	RPGPSPEALLEEGSPTMVEK	ANO8	ENSG00000074855	2139.99	0.000366959	4.28142	0	7.29687	0	4.28142	7.29687
	gi|1034573119	TGAVAPLCVGAMRILANKTR	BCL9L	ENSG00000186174	2097.97	0.00443098	4.31677	0	7.4619	0	4.31677	7.4619
	gi|1034659687	QVNGQQGGGSEPAAAAAVVAAGDK	-	-	2151.74	0.352484	4.51248	0	9.99763	0	4.51248	9.99763
	gi|3122050	AVATGKMDENQFVAVTSTNAAK	DPYSL3	ENSG00000113657	2266.85	0.654555	5.7443	0	9.5024	0	5.7443	9.5024
	gi|767908344	TPDMIQQPRAPLGNTVLPR	TDRD10	ENSG00000163239	2120	0.00974322	6.32692	0	11.5827	0	6.32692	11.5827
	gi|1045859744	GLEWIGRIYTNGSTNYNPSLK	-	-	2382.17	0.0111099	6.36663	0	10.7067	0	6.36663	10.7067
	gi|55977747	GIGMGNIGPAGMGMEGIGFGINK	HNRNPM	ENSG00000099783	2210.05	0.730009	8.83946	0	15.8268	0	8.83946	15.8268
	gi|119610558	DSSSAR	SAT2	ENSG00000141504	622.303	0	12.9174	0	12.913	0	12.9174	12.913
	gi|296434448	AREMPGVWGAGGSLK	CIZ1	ENSG00000148337	1532.06	0.378463	13.1206	0	12.286	0	13.1206	12.286
	gi|406516122	IKQGMMEELLTGKVR	-	-	1765.81	0.0457832	13.3962	0	13.5	0	13.3962	13.5
	Sustained infection markers—quantitative (n = 3): significantly more highly expressed in infected Day 1 vs uninfected Day 1 cells and significantly more highly expressed in infected Day 5 vs uninfected Day 5 cells
	gi|74732608	VVFKDGFK	AIFM3	ENSG00000183773	939.161	0.315448	6.84282	1.65451	14.3852	0	4.13587	14.3852
	gi|119602139	GHIPQQDSNSLCR	-	-	1513.3	0.827333	12.5941	1.92295	14.2326	0	6.54938	14.2326
	gi|298286816	IQVQPMVDPK	KIAA2026	ENSG00000183354	1168.86	0.355692	4.27139	0	8.85738	1.69915	4.27139	5.21282
	Suppresed infection markers—qualitative (n= 5): suppressed in Day 1 infected cells but present in uninfected cells and restored in infected Day 5 cells (i.e. after clearance of Mtb)
	gi|1034612731	VDFPATWYKDGQK	OBSL1	ENSG00000124006	1554.79	0.00812315	0	14.8197	0	14.6717	-14.8197	-14.6717
	gi|119600846	TKASTHAVDRLR	-	-	1351.78	0.00195229	0	14.8271	0	14.3323	-14.8271	-14.3323
	gi|1034562343	TCSTMTGPVHFTVGKSRSSAR	-	-	2267.82	0.929332	0	13.538	0	14.0175	-13.538	-14.0175
	gi|119603680	MAGGGGSSDGSGRAAGR	TERF2	ENSG00000132604	1450.65	0.00728257	0	13.5293	0	13.5484	-13.5293	-13.5484
	gi|116283533	RLTLEGNTMNASNVAK	ZNF440	ENSG00000171295	1718.61	2.41e-13	0	13.2682	0	13.4546	-13.2682	-13.4546
	Suppresed infection markers—quantitative (n= 23): suppressed in Day 1 infected cells but present in uninfected cells and restored in infected Day 5 (i.e. after clearance of Mtb)
	gi|902380326	IWSHGGR	-	-	811.75	0.403558	0	15.0778	9.51841	14.8279	-15.0778	0.641928
	gi|119595630	GSWPVRAPTI	ZGPAT	ENSG00000197114	1085.09	0.277395	0	8.49415	8.25988	9.10571	-8.49415	0.90711
	gi|406530267	IAVDYIKQFDKYSAQGK	-	-	1973.93	1.05732	0	13.5409	12.94	14.056	-13.5409	0.920602
	gi|296040431	MGIAGVVR	CPXM1	ENSG00000088882	819.439	9.62e-05	0	15.8702	11.2401	11.888	-15.8702	0.945494
	gi|119622241	SCSHQEMQVTPMDQK	-	-	1823.34	0.350613	0	12.862	12.0636	12.7538	-12.862	0.945883
	gi|406517371	EILSTAPHAETEQPDNDDIIGK	-	-	2392.83	0.414469	0	13.944	14.1475	14.8741	-13.944	0.95115
	gi|1034561620	LVSGIPSLQIVLKSIMK	CACNA1E	ENSG00000198216	1826.88	0.855652	0	13.4127	12.7995	13.3386	-13.4127	0.959579
	gi|371445534	GRFTISRDDPR	-	-	1318.64	0.387863	0	13.7043	13.2906	13.7487	-13.7043	0.966678
	gi|381142160	GLEWVSSIFSGGNVYYADSVR	-	-	2305.51	1.00179	0	14.1503	13.6722	13.8647	-14.1503	0.986109
	gi|406566009	ELTTHQR	-	-	885.545	0.0122795	0	14.4523	14.2943	14.4131	-14.4523	0.991764
	gi|1034603487	DLTVITR	DCC	ENSG00000187323	816.738	0.00506	0	12.1719	12.2383	12.1908	-12.1719	1.00389
	gi|406526589	IYLATSKPLK	-	-	1132.66	0	0	10.9305	10.9988	10.8759	-10.9305	1.01129
	gi|530381741	HDPSTT	RNF144B	ENSG00000137393	656.84	0.469805	0	14.3548	14.67	14.3516	-14.3548	1.02219
	gi|4557323	HATKTAK	APOC3	ENSG00000110245	756.683	1.19e-13	0	14.3586	11.9377	11.5989	-14.3586	1.02921
	gi|388591629	ALAHVRYLCTQANGGKVK	-	-	1985.67	0.769859	0	15.6402	15.1785	14.6865	-15.6402	1.0335
	gi|612405394	LMIYEVSKRPSGIPDRFSGSK	-	-	2383.19	4.73e-13	0	8.429	8.643	7.45279	-8.429	1.1597
	gi|119630000	DNVKILSSD	-	-	990.244	0.369562	0	9.55954	9.55137	0	-9.55954	9.55137
	gi|189054582	NGVALPR	TDRD7	ENSG00000196116	725.329	0.00660044	0	13.6089	12.8249	0	-13.6089	12.8249
	gi|12084271	SDDTAVYFCAGVYEGEADEGEYR	-	-	2601.51	0.89209	0	13.679	12.9161	0	-13.679	12.9161
	gi|119615828	DARVSDLKRALR	MTHFSD	ENSG00000103248	1400.66	0	0	14.0261	13.6298	0	-14.0261	13.6298
	gi|388593611	YNLMPTKSSNYGIR	-	-	1659.88	0.53068	0	15.6328	13.9845	0	-15.6328	13.9845
	gi|1034639637	VSQQGMDVALQK	GRID2	ENSG00000152208	1319.23	0	0	13.7268	14.0288	0	-13.7268	14.0288
	gi|336067984	VTPAHDVNDHMLGLK	-	-	1646.77	4.82e-13	0	14.3753	14.1469	0	-14.3753	14.1469
Indo-Oceanic (IO) lineage	GI numbers	Peptides	Gene Symbol	Ensembl Gene ID	Mass (Da)	Mass SD (Da)	Infected Day 1	Uninfected Day 1	Infected Day 5	Uninfected Day 5	Fold change Day 1 infected-uninfected	Fold change Day 5 infected-uninfected
	Clearance markers—qualitative (n = 6): Detectable in infected Day 5 cells (i.e. after clearance) only
	gi|116242735	GTGSDGPR	PSTK	ENSG00000179988	745.422	0.00131411	0	0	8.92636	0	0	8.92636
	gi|181616	FGEVISYQQLAALAGNPKATR	MGMT	ENSG00000170430	2234.04	0.00294733	0	0	11.3894	0	0	11.3894
	gi|193806337	GKVLAQQGEYSEAIPILRAALK	FKBP8	ENSG00000105701	2356.18	4.91e-13	0	0	6.88989	0	0	6.88989
	gi|578838219	RCPGAVVPVDLLKLAR	FAM120C	ENSG00000184083	1763.81	0.00875465	0	0	14.9092	0	0	14.9092
	gi|768015681	FDVGPK	DIDO1	ENSG00000101191	661.673	0.30505	0	0	14.2503	0	0	14.2503
	gi|768038890	YQHKNQQAK	DOCK11	ENSG00000147251	1142.87	0.815922	0	0	12.3271	0	0	12.3271
	Clearance markers—quantitative (n = 14):highly expressed at infected Day 5 vs uninfected Day 5, but not highly expressed at infected Day 1 vs uninfected Day1 cells
	gi|567139	LEQSGGGVVKPGGSLR	-	-	1539.78	0.00869672	15.6676	16.2376	15.4493	0	0.964898	15.4493
	gi|1034634650	AGAGK	KIF15	ENSG00000280610; ENSG00000163808	403.236	0.0155975	15.5998	15.8618	15.4296	0	0.983482	15.4296
	gi|767966098	TTPSPR	CDHR5	ENSG00000273572; ENSG00000099834	656.591	0.729673	14.6424	14.6531	14.9724	0	0.999269	14.9724
	gi|406525470	VTFGAYDEKNGR	-	-	1357.68	0.00518968	15.6363	15.6621	14.5752	0	0.998355	14.5752
	gi|406527412	KGAFDGMLQKRR	-	-	1419.7	0	14.5283	14.5297	14.2898	0	0.999908	14.2898
	gi|336069353	AIREGVKMIFNKFVK	-	-	1780.3	0.571015	12.1508	14.3174	14.1922	0	0.848671	14.1922
	gi|721363461	AEMQNCSDPMMKLLLDKK	-	-	2183.44	0.500067	14.114	14.4986	14.1811	0	0.973472	14.1811
	gi|21359894	KLNFQAFAELCRKR	ITPK1	ENSG00000274958; ENSG00000100605	1780.82	0.298104	13.8709	14.6193	14.1133	0	0.948806	14.1133
	gi|363985888	TAEAAEQMKRLDGK	-	-	1567.68	0.461585	12.6851	14.1262	13.7415	0	0.897982	13.7415
	gi|1034632094	ESKSPGK	RFTN1	ENSG00000131378	732.417	0.000135608	13.3691	13.7264	13.5397	0	0.973968	13.5397
	gi|1034671519	VLYSTAMESIQGPGK	-	-	1598.17	0.935341	13.2124	13.4534	13.216	0	0.982091	13.216
	gi|530412564	IMNEEDPEKQRR	CCDC47	ENSG00000108588	1559.65	0.911279	13.344	13.6008	13.1756	0	0.981117	13.1756
	gi|371446637	EYGDSVK	-	-	796.711	0.0019957	11.0566	11.4794	12.2297	0	0.963168	12.2297
	gi|406533031	TAEYMAQCGVDLIIGSHPHVMQRVGK	-	-	2929.83	0.24291	10.8902	11.6544	11.7333	0	0.934432	11.7333
	Early infection markers—qualitative (n = 4): Detectable in infected Day 1 cells only
	gi|1045859744	GLEWIGRIYTNGSTNYNPSLK	-	-	2382.17	0.0111099	6.05108	0	0	0	6.05108	0
	gi|119610558	DSSSAR	SAT2	ENSG00000141504	622.303	0	13.2861	0	0	0	13.2861	0
	gi|317373419	HGTPRRLLYCQR	MMP14	ENSG00000157227	1554.82	0.00249291	15.4334	0	0	0	15.4334	0
	gi|55977747	GIGMGNIGPAGMGMEGIGFGINK	HNRNPM	ENSG00000099783	2210.05	0.730009	9.04271	0	0	0	9.04271	0
	Early infection markers—quantitative (n = 17): highly expressed at infected Day 1 vs uninfected Day 1 cells, but not significantly more highly expressed at infected Day 5 vs uninfected Day 5 cells
	gi|406535035	VTHAPR	-	-	679.513	0.00322252	18.75	0	17.805	18.6685	18.75	0.953746
	gi|363986532	TPGLVR	-	-	643.317	0.00268764	16.223	0	15.1142	16.0078	16.223	0.944175
	gi|11514290	VTPFYAVXCNDSK	-	-	1498.91	0.268837	15.7091	0	11.1955	12.7147	15.7091	0.880514
	gi|1034560884	IIYNNLGIDEGAWMK	RYR2	ENSG00000198626	1754.18	0.775595	15.1782	0	14.6407	14.9147	15.1782	0.98163
	gi|1034587608	SRAQGCCAGER	-	-	1248.62	0.568302	14.825	0	14.0869	14.0996	14.825	0.999101
	gi|10433965	MSPRVVNRMSR	BCAS3	ENSG00000141376	1363.87	0.51716	14.2037	0	13.8575	13.9887	14.2037	0.990615
	gi|23295949	FTAQXNKASQYVSLLIR	-	-	2024.35	0.834018	14.021	0	11.7224	14.095	14.021	0.831668
	gi|406513853	YTDLVGKEVELPLTDR	-	-	1846.93	0.00646647	13.7654	0	13.3665	14.1858	13.7654	0.942244
	gi|97536293	LRAPSAAAMQR	GPRIN2	ENSG00000204175	1172.31	0.427656	8.78264	0.645769	2.66802	7.91206	13.6003	0.337209
	gi|1710614	YCNLMMQRRK	RNASE4	ENSG00000258818	1431.74	0.000634557	13.5552	0	13.495	13.5135	13.5552	0.998631
	gi|1034609680	ESILSSSPNAGSKR	ZNF541	ENSG00000118156	1431.74	0	13.5387	0	13.2794	13.3123	13.5387	0.997532
	gi|17402861	RYAEVDK	SGK3	ENSG00000104205	879.492	1.18e-13	13.5346	0	13.1271	13.128	13.5346	0.999926
	gi|1034698040	FSDPR	-	-	621.82	0.00112535	13.2583	0	13.3064	13.37	13.2583	0.995242
	gi|1013173930	VGLTMSG	-	-	680.838	0.413553	12.9871	0	14.1864	14.2681	12.9871	0.994275
	gi|62088522	SNCSRLSARR	RPL12P16	-	1205.87	0.540536	12.4559	0	11.0265	11.3238	12.4559	0.973747
	gi|406545128	INVEPRVKR	-	-	1109.64	0.000595993	12.0004	0	11.577	11.8953	12.0004	0.973243
	gi|158260215	MNSSPAGAPSPQPSR	SGK2	ENSG00000101049	1498.67	2.4e-13	11.5549	0	10.0541	10.33	11.5549	0.973289
	Sustained infection markers—qualitative (n = 8): Detectable in infected Day 1 and Day 5 cells but not in uninfected cells
	gi|119586278	SKFELGK	-	-	807.472	0.00150543	16.9356	0	16.1534	0	16.9356	16.1534
	gi|406516122	IKQGMMEELLTGKVR	-	-	1765.81	0.0457832	13.9346	0	13.3312	0	13.9346	13.3312
	gi|40977618	VVGLXIC	-	-	758.345	1.25e-13	13.6047	0	12.6803	0	13.6047	12.6803
	gi|296434448	AREMPGVWGAGGSLK	CIZ1	ENSG00000148337	1532.06	0.378463	7.59838	0	9.77115	0	7.59838	9.77115
	gi|767908344	TPDMIQQPRAPLGNTVLPR	TDRD10	ENSG00000163239	2120	0.00974322	4.97497	0	9.00446	0	4.97497	9.00446
	gi|3122050	AVATGKMDENQFVAVTSTNAAK	DPYSL3	ENSG00000113657	2266.85	0.654555	7.14568	0	8.72814	0	7.14568	8.72814
	gi|1034659687	QVNGQQGGGSEPAAAAAVVAAGDK	-	-	2151.74	0.352484	7.3457	0	8.11735	0	7.3457	8.11735
	gi|114152287	RPGPSPEALLEEGSPTMVEK	ANO8	ENSG00000074855	2139.99	0.000366959	4.87067	0	5.71136	0	4.87067	5.71136
	Sustained infection markers—quantitative (n = 2): Significantly more highly expressed at infected Day 1 vs uninfected Day 1 cells and significantly more highly expressed at infected Day 5 vs uninfected Day 5 cells
	gi|119602139	GHIPQQDSNSLCR	-	-	1513.3	0.827333	14.2432	1.92295	14.1864	0	7.40695	14.1864
	gi|298286816	IQVQPMVDPK	KIAA2026	ENSG00000183354	1168.86	0.355692	5.25227	0	10.8498	1.69915	5.25227	6.38541
	Suppresed infection markers—qualitative (n= 5): Suppressed in Day 1 infected cells but present in uninfected cells and restored in infected Day 5 (i.e. after clearance)
	gi|7662160	VEKKANLSFSMMGDR	EFCAB14	ENSG00000159658	1728.35	0.266945	0	14.6587	0	15.058	-14.6587	-15.058
	gi|530381741	HDPSTT	RNF144B	ENSG00000137393	656.84	0.469805	0	14.3548	0	14.3516	-14.3548	-14.3516
	gi|1034562343	TCSTMTGPVHFTVGKSRSSAR	-	-	2267.82	0.929332	0	13.538	0	14.0175	-13.538	-14.0175
	gi|1034561620	LVSGIPSLQIVLKSIMK	CACNA1E	ENSG00000198216	1826.88	0.855652	0	13.4127	0	13.3386	-13.4127	-13.3386
	gi|119622241	SCSHQEMQVTPMDQK	-	-	1823.34	0.350613	0	12.862	0	12.7538	-12.862	-12.7538
	Suppresed infection markers—quantitative (n= 18): Suppressed in Day 1 infected cells but present in uninfected cells and restored in infected Day 5 (i.e. after clearance)
	gi|406525268	KEIANVYNPTGDVK	-	-	1547.7	2.38e-13	0	12.7835	12.3147	13.051	-12.7835	0.943584
	gi|406530267	IAVDYIKQFDKYSAQGK	-	-	1973.93	1.05732	0	13.5409	13.2755	14.056	-13.5409	0.944468
	gi|406559961	SMRMGK	-	-	709.763	0.0020484	0	10.3385	9.72119	9.88089	-10.3385	0.983838
	gi|119600846	TKASTHAVDRLR	-	-	1351.78	0.00195229	0	14.8271	14.3032	14.3323	-14.8271	0.997965
	gi|194382338	EADGVHLAGEGAGPSGQPS	-	-	1734.86	0.0166934	0	14.727	14.4698	14.498	-14.727	0.99806
	gi|406566009	ELTTHQR	-	-	885.545	0.0122795	0	14.4523	14.4663	14.4131	-14.4523	1.00369
	gi|194375313	LQDTHSPR	WDR13	ENSG00000101940	952.581	0.272841	0	12.0914	11.8997	11.8408	-12.0914	1.00498
	gi|40042136	EXKSESR	-	-	821.469	1.19e-13	0	14.7328	15.1087	15.0163	-14.7328	1.00616
	gi|15823655	SPRTRAPAPR	FAM117B	ENSG00000138439	1109.29	0.235453	0	8.6979	9.77147	9.08026	-8.6979	1.07612
	gi|14485051	RFSDKLIFGKGTR	-	-	1525.79	0.390694	0	15.5264	14.535	12.4455	-15.5264	1.16789
	gi|68565595	LGQEEPPLMGNGWAGGGPRPPR	CALHM1	ENSG00000185933	2271.97	4.72e-13	0	9.08725	15.4736	8.69127	-9.08725	1.78036
	gi|119619673	EAMVKLK	GOLGA6B	ENSG00000215186	819.439	1.22e-13	0	14.522	10.6788	0	-14.522	10.6788
	gi|1230898783	DEHGK	-	-	584.81	0.00393277	0	11.2443	11.277	0	-11.2443	11.277
	gi|388592413	MILSMTGYGK	-	-	1132.66	0	0	12.1823	11.3568	0	-12.1823	11.3568
	gi|119629562	DEGTPGLLASGLLLR	-	-	1510.73	0.0377388	0	13.848	11.5204	0	-13.848	11.5204
	gi|406538439	VPLKYIDSTPHGDIIGR	-	-	1879.95	0	0	12.4581	12.0082	0	-12.4581	12.0082
	gi|119615828	DARVSDLKRALR	MTHFSD	ENSG00000103248	1400.66	0	0	14.0261	13.9056	0	-14.0261	13.9056
	gi|388593611	YNLMPTKSSNYGIR	-	-	1659.88	0.53068	0	15.6328	15.3971	0	-15.6328	15.3971
Euro-American (EuA) lineage	GI numbers	Peptides	Gene Symbols	Ensembl Gene ID	Mass (Da)	Mass SD (Da)	Infected Day 1	Uninfected Day 1	Infected Day 5	Uninfected Day 5	Fold change Day 1 infected-uninfected	Fold change Day 5 infected-uninfected
	Clearance markers—qualitative (n = 6): Detectable in infected Day 5 cells (i.e. after clearance) only
	gi|112699423	STISRDNSKNVLFLQMNSLR	-	-	2336.07	4.91e-13	0	0	6.37251	0	0	6.37251
	gi|116242735	GTGSDGPR	PSTK	ENSG00000179988	745.422	0.00131411	0	0	7.18703	0	0	7.18703
	gi|119610558	DSSSAR	SAT2	ENSG00000141504	622.303	0	0	0	13.115	0	0	13.115
	gi|181616	FGEVISYQQLAALAGNPKATR	MGMT	ENSG00000170430	2234.04	0.00294733	0	0	12.0058	0	0	12.0058
	gi|193806337	GKVLAQQGEYSEAIPILRAALK	FKBP8	ENSG00000105701	2356.18	4.91e-13	0	0	4.7642	0	0	4.7642
	gi|317373419	HGTPRRLLYCQR	MMP14	ENSG00000157227	1554.82	0.00249291	0	0	15.4117	0	0	15.4117
	Clearance markers—quantitative (n = 14):highly expressed at infected Day 5 vs uninfected Day 5, but not highly expressed at infected Day 1 vs uninfected Day1 cells
	gi|530412564	IMNEEDPEKQRR	CCDC47	ENSG00000108588	1559.65	0.911279	13.5988	13.6008	12.9255	0	0.99985	12.9255
	gi|116242826	AGAAASR	TRIM41	ENSG00000146063	602.335	0	12.4269	12.4437	12.5282	0	0.998651	12.5282
	gi|1034671519	VLYSTAMESIQGPGK	-	-	1598.17	0.935341	13.3978	13.4534	10.6695	0	0.99587	10.6695
	gi|721363461	AEMQNCSDPMMKLLLDKK	-	-	2183.44	0.500067	14.4375	14.4986	14.1409	0	0.995789	14.1409
	gi|119614597	NYLLESPHRFR	-	-	1431.73	0.00580333	13.6392	13.7318	13.6446	0	0.993251	13.6446
	gi|406538439	VPLKYIDSTPHGDIIGR	-	-	1879.95	0	12.3412	12.4581	12.142	0	0.990618	12.142
	gi|567139	LEQSGGGVVKPGGSLR	-	-	1539.78	0.00869672	16.0845	16.2376	15.0803	0	0.990571	15.0803
	gi|160113087	SSRSLTISIVAAAGRELFMTDRER	USH1C	ENSG00000006611	2665.72	0.00795382	11.7855	11.9311	9.90699	0	0.987798	9.90699
	gi|363985888	TAEAAEQMKRLDGK	-	-	1567.68	0.461585	13.7033	14.1262	12.7363	0	0.970063	12.7363
	gi|21359894	KLNFQAFAELCRKR	ITPK1	ENSG00000274958; ENSG00000100605	1780.82	0.298104	14.1692	14.6193	13.5469	0	0.969211	13.5469
	gi|221040448	AAPRRAMDGRTPRPQDAPAR	COBLL1	ENSG00000082438	2207.66	0.472101	12.7626	13.1699	12.5128	0	0.969076	12.5128
	gi|406533031	TAEYMAQCGVDLIIGSHPHVMQRVGK	-	-	2929.83	0.24291	11.091	11.6544	10.6129	0	0.95166	10.6129
	gi|371446637	EYGDSVK	-	-	796.711	0.0019957	10.9102	11.4794	12.4473	0	0.950413	12.4473
	gi|1034634650	AGAGK	KIF15	ENSG00000280610; ENSG00000163808	403.236	0.0155975	10.9958	15.8618	11.1208	0	0.693224	11.1208
	Early infection markers—qualitative (n = 3): Detectable in infected Day 1 cells only
	gi|40977618	VVGLXIC	-	-	758.345	1.25e-13	13.7413	0	0	0	13.7413	0
	gi|767962174	MGINFHHPGTDNIMALNTR	CPEB3	ENSG00000107864	2156	0	6.64274	0	0	0	6.64274	0
	gi|768038890	YQHKNQQAK	DOCK11	ENSG00000147251	1142.87	0.815922	13.7417	0	0	0	13.7417	0
	Early infection markers—quantitative (n = 12): highly expressed at infected Day 1 vs uninfected Day 1 cells, but not significantly more highly expressed at infected Day 5 vs uninfected Day 5 cells
	gi|11514290	VTPFYAVXCNDSK	-	-	1498.91	0.268837	15.7724	0	10.7384	12.7147	15.7724	0.844565
	gi|336068135	AMGADYIIGVTVQGPPR	-	-	1744.89	0	17.8185	0	15.8323	16.9775	17.8185	0.932542
	gi|406513853	YTDLVGKEVELPLTDR	-	-	1846.93	0.00646647	13.8739	0	13.5615	14.1858	13.8739	0.955987
	gi|406535035	VTHAPR	-	-	679.513	0.00322252	18.0355	0	17.9327	18.6685	18.0355	0.960587
	gi|62088522	SNCSRLSARR	RPL12P16	-	1205.87	0.540536	10.689	0	10.9465	11.3238	10.689	0.966678
	gi|1034560884	IIYNNLGIDEGAWMK	RYR2	ENSG00000198626	1754.18	0.775595	15.142	0	14.4728	14.9147	15.142	0.970368
	gi|363986532	TPGLVR	-	-	643.317	0.00268764	13.6616	0	15.5397	16.0078	13.6616	0.970755
	gi|34534938	GFDKIQHPFMMK	LOC399975	-	1511.7	0	14.3026	0	13.8251	14.1955	14.3026	0.973904
	gi|23295949	FTAQXNKASQYVSLLIR	-	-	2024.35	0.834018	14.2546	0	13.7851	14.095	14.2546	0.978012
	gi|17402861	RYAEVDK	SGK3	ENSG00000104205	879.492	1.18e-13	13.676	0	12.88	13.128	13.676	0.981109
	gi|1034580323	FVATK	RESF1	ENSG00000174718	564.293	0.00921943	15.4329	0	15.0597	15.3045	15.4329	0.984007
	gi|1034587608	SRAQGCCAGER	-	-	1248.62	0.568302	14.1532	0	13.9416	14.0996	14.1532	0.988795
	Sustained infection markers—qualitative (n = 13): Detectable in infected Day 1 and Day 5 cells but not in uninfected cells
	gi|119586278	SKFELGK	-	-	807.472	0.00150543	16.3463	0	16.4812	0	16.3463	16.4812
	gi|768015681	FDVGPK	DIDO1	ENSG00000101191	661.673	0.30505	15.2515	0	14.1493	0	15.2515	14.1493
	gi|578838219	RCPGAVVPVDLLKLAR	FAM120C	ENSG00000184083	1763.81	0.00875465	14.721	0	14.3964	0	14.721	14.3964
	gi|406516122	IKQGMMEELLTGKVR	-	-	1765.81	0.0457832	14.0674	0	13.6439	0	14.0674	13.6439
	gi|296434448	AREMPGVWGAGGSLK	CIZ1	ENSG00000148337	1532.06	0.378463	12.4825	0	12.0508	0	12.4825	12.0508
	gi|55977747	GIGMGNIGPAGMGMEGIGFGINK	HNRNPM	ENSG00000099783	2210.05	0.730009	10.557	0	14.78	0	10.557	14.78
	gi|767908344	TPDMIQQPRAPLGNTVLPR	TDRD10	ENSG00000163239	2120	0.00974322	9.54027	0	10.0533	0	9.54027	10.0533
	gi|1034659687	QVNGQQGGGSEPAAAAAVVAAGDK	-	-	2151.74	0.352484	9.05927	0	9.14	0	9.05927	9.14
	gi|296434481	ETEIFFQPSQGYRPPPFSEK	DMXL2	ENSG00000104093	2383.2	0	8.50762	0	10.1885	0	8.50762	10.1885
	gi|1045859744	GLEWIGRIYTNGSTNYNPSLK	-	-	2382.17	0.0111099	7.3856	0	10.7306	0	7.3856	10.7306
	gi|3122050	AVATGKMDENQFVAVTSTNAAK	DPYSL3	ENSG00000113657	2266.85	0.654555	7.21557	0	9.76383	0	7.21557	9.76383
	gi|1034573119	TGAVAPLCVGAMRILANKTR	BCL9L	ENSG00000186174	2097.97	0.00443098	6.41642	0	6.55128	0	6.41642	6.55128
	gi|114152287	RPGPSPEALLEEGSPTMVEK	ANO8	ENSG00000074855	2139.99	0.000366959	5.82135	0	6.91207	0	5.82135	6.91207
	Sustained infection markers—quantitative (n = 4): Significantly more highly expressed at infected Day 1 vs uninfected Day 1 cells and significantly more highly expressed at infected Day 5 vs uninfected Day 5 cells
	gi|119602139	GHIPQQDSNSLCR	-	-	1513.3	0.827333	14.267	1.92295	13.8676	0	7.41936	13.8676
	gi|74732608	VVFKDGFK	AIFM3	ENSG00000183773	939.161	0.315448	14.5586	1.65451	6.14653	0	8.79935	6.14653
	gi|298286816	IQVQPMVDPK	KIAA2026	ENSG00000183354	1168.86	0.355692	4.76776	0	10.0751	1.69915	4.76776	5.9295
	gi|40046736	XSVKSSFSYLQGKNYQNTMN	-	-	2267.77	0.249099	8.87587	2.19868	8.33426	1.88594	4.0369	4.41915
	Suppresed infection markers—qualitative (n= 3): Suppressed in Day 1 infected cells but present in uninfected cells and restored in infected Day 5 (i.e. after clearance)
	gi|41688816	LYSRSSDRSGSCSSLSPPR	SPEN	ENSG00000065526	2097.97	0.00251589	0	3.42133	0	2.24952	-3.42133	-2.24952
	gi|406559961	SMRMGK	-	-	709.763	0.0020484	0	10.3385	0	9.88089	-10.3385	-9.88089
	gi|1034612731	VDFPATWYKDGQK	OBSL1	ENSG00000124006	1554.79	0.00812315	0	14.8197	0	14.6717	-14.8197	-14.6717
	Suppresed infection markers—quantitative (n= 23): Suppressed in Day 1 infected cells but present in uninfected cells and restored in infected Day 5 (i.e. after clearance)
	gi|93141230	CSHVEFGMWK	ARL17B	ENSG00000275748; ENSG00000276276; ENSG00000228696	1279.73	2.37e-13	0	12.535	9.28495	11.7472	-12.535	0.7904
	gi|642945633	ASDITK	TTN	ENSG00000155657	634.826	0.00193129	0	11.5762	10.9353	13.175	-11.5762	0.830002
	gi|1027002843	ATPTIR	SPSK_03959	-	657.841	1.2e-13	0	14.8011	12.3316	14.2936	-14.8011	0.862739
	gi|406527457	EGKLKKIIVTGCMAQR	-	-	1847.84	2.38e-13	0	13.207	11.7548	12.8648	-13.207	0.913713
	gi|406545701	INEPALDLALVMALISSFK	-	-	2041.97	0	0	15.676	15.7089	16.9157	-15.676	0.928655
	gi|119579832	EQRALQVSPPT	BCOR	ENSG00000183337	1224.6	2.37e-13	0	12.9376	12.767	13.5894	-12.9376	0.939487
	gi|767903972	DGLSVPK	C1orf174	ENSG00000198912	715.339	0.00117629	0	13.7166	13.2839	14.1336	-13.7166	0.939879
	gi|1034561620	LVSGIPSLQIVLKSIMK	CACNA1E	ENSG00000198216	1826.88	0.855652	0	13.4127	12.6878	13.3386	-13.4127	0.951203
	gi|6330248	KGSAGSGAHARAGEAK	PNMA8B	ENSG00000204851	1456.13	0.413094	0	11.3907	11.28	11.5792	-11.3907	0.974161
	gi|116283533	RLTLEGNTMNASNVAK	ZNF440	ENSG00000171295	1718.61	2.41e-13	0	13.2682	13.3316	13.4546	-13.2682	0.990863
	gi|902380326	IWSHGGR	-	-	811.75	0.403558	0	15.0778	14.727	14.8279	-15.0778	0.993199
	gi|40042136	EXKSESR	-	-	821.469	1.19e-13	0	14.7328	15.0354	15.0163	-14.7328	1.00128
	gi|1034565917	GFTPVVDDPVTER	NEBL	ENSG00000078114	1431.74	0.00284708	0	13.2398	13.3157	13.2743	-13.2398	1.00312
	gi|406514858	IPSADT	-	-	602.868	0.00203981	0	13.5002	13.5173	13.438	-13.5002	1.0059
	gi|530381741	HDPSTT	RNF144B	ENSG00000137393	656.84	0.469805	0	14.3548	14.4514	14.3516	-14.3548	1.00695
	gi|119575651	NETMEHNRTRGPVELR	-	-	1938.63	0.502676	0	14.6249	12.7721	12.6649	-14.6249	1.00847
	gi|388591629	ALAHVRYLCTQANGGKVK	-	-	1985.67	0.769859	0	15.6402	15.118	14.6865	-15.6402	1.02938
	gi|336068211	GRFPDISNGR	-	-	1117.61	0	0	11.8163	11.2013	10.7117	-11.8163	1.0457
	gi|15823655	SPRTRAPAPR	FAM117B	ENSG00000138439	1109.29	0.235453	0	8.6979	9.71158	9.08026	-8.6979	1.06953
	gi|612405394	LMIYEVSKRPSGIPDRFSGSK	-	-	2383.19	4.73e-13	0	8.429	8.05856	7.45279	-8.429	1.08128
	gi|1230897427	HIGIIMDGNGR	-	-	1199.6	2.37e-13	0	10.161	9.91853	0	-10.161	9.91853
	gi|1034643921	MLIAASYGNVISIFEPVNLPK	DMXL1	ENSG00000172869	2291.3	0.965052	0	13.0724	13.3657	0	-13.0724	13.3657
	gi|336067984	VTPAHDVNDHMLGLK	-	-	1646.77	4.82e-13	0	14.3753	14.08	0	-14.3753	14.08
H37Rv strain	GI numbers	Peptides	Gene symbols	Ensembl Gene ID	Mass (Da)	Mass SD (Da)	Infected Day 1	Uninfected Day 1	Infected Day 5	Uninfected Day 5	Fold change Day 1 infected-uninfected	Fold change Day 5 infected-uninfected
	Clearance markers—qualitative (n = 10): Detectable in infected Day 5 cells (i.e. after clearance) only
	gi|116242735	GTGSDGPR	PSTK	ENSG00000179988	745.422	0.00131411	0	0	12.4681	0	0	12.4681
	gi|767962174	MGINFHHPGTDNIMALNTR	CPEB3	ENSG00000107864	2156	0	0	0	13.1051	0	0	13.1051
	gi|112699423	STISRDNSKNVLFLQMNSLR	-	-	2336.07	4.91e-13	0	0	13.1173	0	0	13.1173
	gi|193806337	GKVLAQQGEYSEAIPILRAALK	FKBP8	ENSG00000105701	2356.18	4.91e-13	0	0	13.3633	0	0	13.3633
	gi|1034573119	TGAVAPLCVGAMRILANKTR	BCL9L	ENSG00000186174	2097.97	0.00443098	0	0	13.4161	0	0	13.4161
	gi|296434481	ETEIFFQPSQGYRPPPFSEK	DMXL2	ENSG00000104093	2383.2	0	0	0	13.7251	0	0	13.7251
	gi|444737927	MPSQDVSGSEDTFPNKRPR	SPRTN	ENSG00000010072	2148	0	0	0	14.0996	0	0	14.0996
	gi|296452942	CATPPQLANGVTEGLDYGFMK	SVEP1	ENSG00000165124	2283.17	0.00560289	0	0	14.8402	0	0	14.8402
	gi|181616	FGEVISYQQLAALAGNPKATR	MGMT	ENSG00000170430	2234.04	0.00294733	0	0	15.1866	0	0	15.1866
	gi|317373419	HGTPRRLLYCQR	MMP14	ENSG00000157227	1554.82	0.00249291	0	0	15.6644	0	0	15.6644
	Clearance markers—quantitative (n = 18):highly expressed in infected Day 5 vs uninfected Day 5 cells, but not highly expressed in infected Day 1 vs uninfected Day 1 cells
	gi|1230897427	HIGIIMDGNGR	-	-	1199.6	2.37e-13	10.1129	10.161	10.0388	0	0.995263	10.0388
	gi|406533031	TAEYMAQCGVDLIIGSHPHVMQRVGK	-	-	2929.83	0.24291	10.5182	11.6544	10.3838	0	0.902512	10.3838
	gi|1230898783	DEHGK	-	-	584.81	0.00393277	11.1738	11.2443	11.2812	0	0.993727	11.2812
	gi|119619489	LVGLGLGSGEGEPR	-	-	1341.64	0.00114475	13.1111	13.4392	12.2971	0	0.975587	12.2971
	gi|221040448	AAPRRAMDGRTPRPQDAPAR	COBLL1	ENSG00000082438	2207.66	0.472101	13.0933	13.1699	12.5189	0	0.994182	12.5189
	gi|189054582	NGVALPR	TDRD7	ENSG00000196116	725.329	0.00660044	12.8377	13.6089	12.8144	0	0.943338	12.8144
	gi|406516825	KYLADMNPIEAMDFVKDR	-	-	2172.8	0.330694	13.4637	13.6611	13.0445	0	0.985549	13.0445
	gi|1034671519	VLYSTAMESIQGPGK	-	-	1598.17	0.935341	12.5708	13.4534	13.069	0	0.934395	13.069
	gi|21359894	KLNFQAFAELCRKR	ITPK1	ENSG00000274958; ENSG00000100605	1780.82	0.298104	13.1266	14.6193	13.253	0	0.897897	13.253
	gi|530412564	IMNEEDPEKQRR	CCDC47	ENSG00000108588	1559.65	0.911279	12.9356	13.6008	13.2725	0	0.951091	13.2725
	gi|363985888	TAEAAEQMKRLDGK	-	-	1567.68	0.461585	13.0118	14.1262	13.2744	0	0.921111	13.2744
	gi|406534716	IFRFNPGKELK	-	-	1350.12	0.503794	13.9976	14.1197	13.2757	0	0.99135	13.2757
	gi|1034572457	SAWSPELFS	-	-	1023.53	1.19e-13	14.6168	14.9027	13.5097	0	0.980817	13.5097
	gi|721363461	AEMQNCSDPMMKLLLDKK	-	-	2183.44	0.500067	13.936	14.4986	13.6343	0	0.9612	13.6343
	gi|406525470	VTFGAYDEKNGR	-	-	1357.68	0.00518968	14.7699	15.6621	15.0973	0	0.943038	15.0973
	gi|567139	LEQSGGGVVKPGGSLR	-	-	1539.78	0.00869672	14.709	16.2376	15.1581	0	0.905862	15.1581
	gi|767966098	TTPSPR	CDHR5	ENSG00000273572; ENSG00000099834	656.591	0.729673	3.5181	14.6531	15.1906	0	0.240093	15.1906
	gi|1034634650	AGAGK	KIF15	ENSG00000280610; ENSG00000163808	403.236	0.0155975	15.8607	15.8618	15.6431	0	0.999931	15.6431
	Early infection markers—qualitative (n = 0): Detectable in infected Day 1 cells only
	-	-	-	-	-	-	-	-	-	-	-	-
	Early infection markers—quantitative (n = 16): highly expressed in infected Day 1 vs uninfected Day 1 cells, but not significantly more highly expressed in infected Day 5 vs uninfected Day 5 cells
	gi|1230899069	NLKEISDLIK	-	-	1173.25	0.35121	13.8541	0	8.71555	12.1147	13.8541	0.719421
	gi|1034587608	SRAQGCCAGER	-	-	1248.62	0.568302	13.7616	0	12.0858	14.0996	13.7616	0.857169
	gi|92098125	SKVGER	ERBIN	ENSG00000112851	957.13	0.00378992	7.40195	0	13.0824	14.2553	7.40195	0.917724
	gi|34534938	GFDKIQHPFMMK	LOC399975	-	1511.7	0	13.7185	0	13.2121	14.1955	13.7185	0.930725
	gi|1034560884	IIYNNLGIDEGAWMK	RYR2	ENSG00000198626	1754.18	0.775595	14.6141	0	13.9904	14.9147	14.6141	0.938027
	gi|1034580323	FVATK	RESF1	ENSG00000174718	564.293	0.00921943	15.3305	0	14.605	15.3045	15.3305	0.954293
	gi|406535035	VTHAPR	-	-	679.513	0.00322252	18.2594	0	18.3709	18.6685	18.2594	0.984058
	gi|336068135	AMGADYIIGVTVQGPPR	-	-	1744.89	0	17.2002	0	16.726	16.9775	17.2002	0.985185
	gi|10433965	MSPRVVNRMSR	BCAS3	ENSG00000141376	1363.87	0.51716	13.6812	0	13.9003	13.9887	13.6812	0.99368
	gi|62088522	SNCSRLSARR	RPL12P16	-	1205.87	0.540536	14.4228	0	11.2814	11.3238	14.4228	0.996255
	gi|1710614	YCNLMMQRRK	RNASE4	ENSG00000258818	1431.74	0.000634557	13.5393	0	13.4921	13.5135	13.5393	0.998415
	gi|1013173930	VGLTMSG	-	-	680.838	0.413553	13.3532	0	14.3255	14.2681	13.3532	1.00402
	gi|221044476	RYKGHR	DCAF8	ENSG00000132716	816.743	0.00746689	13.4875	0	13.7307	13.6202	13.4875	1.00811
	gi|112894	HFAAASGKVSPTASR	TNFAIP3	ENSG00000118503	1485.77	0.00447093	14.509	0	14.7629	14.4508	14.509	1.02159
	gi|17402861	RYAEVDK	SGK3	ENSG00000104205	879.492	1.18e-13	13.8968	0	13.5606	13.128	13.8968	1.03295
	gi|1034578830	GTMMR	-	-	610.148	0.255799	14.4831	0	8.85121	8.30614	14.4831	1.06562
	Sustained infection markers—qualitative (n = 10): Detectable in infected Day 1 and Day 5 cells but not in uninfected cells
	gi|119586278	SKFELGK	-	-	807.472	0.00150543	16.6978	0	16.4414	0	16.6978	16.4414
	gi|406516122	IKQGMMEELLTGKVR	-	-	1765.81	0.0457832	13.7872	0	13.453	0	13.7872	13.453
	gi|119610558	DSSSAR	SAT2	ENSG00000141504	622.303	0	13.0379	0	12.9538	0	13.0379	12.9538
	gi|767908344	TPDMIQQPRAPLGNTVLPR	TDRD10	ENSG00000163239	2120	0.00974322	12.7418	0	15.8604	0	12.7418	15.8604
	gi|296434448	AREMPGVWGAGGSLK	CIZ1	ENSG00000148337	1532.06	0.378463	12.6718	0	15.6506	0	12.6718	15.6506
	gi|55977747	GIGMGNIGPAGMGMEGIGFGINK	HNRNPM	ENSG00000099783	2210.05	0.730009	11.8956	0	17.7447	0	11.8956	17.7447
	gi|1045859744	GLEWIGRIYTNGSTNYNPSLK	-	-	2382.17	0.0111099	10.9902	0	14.4468	0	10.9902	14.4468
	gi|3122050	AVATGKMDENQFVAVTSTNAAK	DPYSL3	ENSG00000113657	2266.85	0.654555	10.712	0	13.6634	0	10.712	13.6634
	gi|1034659687	QVNGQQGGGSEPAAAAAVVAAGDK	-	-	2151.74	0.352484	10.5267	0	13.4367	0	10.5267	13.4367
	gi|114152287	RPGPSPEALLEEGSPTMVEK	ANO8	ENSG00000074855	2139.99	0.000366959	6.67662	0	13.3894	0	6.67662	13.3894
	Sustained infection markers—quantitative (n = 11): Significantly more highly expressed in infected Day 1 vs uninfected Day 1 cells and significantly more highly expressed in infected Day 5 vs uninfected Day 5 cells
	gi|74732608	VVFKDGFK	AIFM3	ENSG00000183773	939.161	0.315448	15.6998	1.65451	14.6429	0	9.48912	14.6429
	gi|119602139	GHIPQQDSNSLCR	-	-	1513.3	0.827333	15.037	1.92295	14.8877	0	7.81978	14.8877
	gi|51701343	WQDIQNDPRYMILNEPFK	CHD5	ENSG00000116254	2324.12	4.75e-13	10.0761	2.21433	13.078	0	4.55041	13.078
	gi|147744602	GIGSRLLTKMGYEFGKGLGR	ZGPAT	ENSG00000197114	2153	0.63498	10.3702	2.5333	14.036	0	4.09355	14.036
	gi|298286816	IQVQPMVDPK	KIAA2026	ENSG00000183354	1168.86	0.355692	6.68018	0	10.2845	1.69915	6.68018	6.0527
	gi|40046736	XSVKSSFSYLQGKNYQNTMN	-	-	2267.77	0.249099	10.3353	2.19868	17.2109	1.88594	4.70068	9.1259
	gi|119631528	QLCQKPSDSPASTPQAKWRR	-	-	2336.07	9.47e-13	9.84827	1.0779	13.3429	2.16873	9.1365	6.15237
	gi|519672992	DLRGCGSSASCYGMDVWGR	-	-	2133.99	0.00800105	10.4105	2.3575	14.0488	3.05056	4.41589	4.60532
	gi|20138952	MQGIKMLGELLEESQMEATR	TNIP1	ENSG00000145901	2326.18	0.00179936	8.31698	0	15.1028	3.5533	8.31698	4.25037
	gi|119618300	DLGGDRGRACDGSGLSASAGLGK	-	-	2176.58	0.672045	11.5391	0.318069	14.9596	3.57024	36.2784	4.19009
	gi|42558478	QGDTAVYAEMVSYENQAKYR	FER1L5	ENSG00000249715	2324.67	0.708585	11.9035	0	15.4961	3.82565	11.9035	4.05057
	Sustained suppresed infection markers (n= 5): Suppressed in Day 1 infected cells but present in uninfected cells and restored in infected Day 5 (i.e. after clearance)
	gi|1034612731	VDFPATWYKDGQK	OBSL1	ENSG00000124006	1554.79	0.00812315	0	14.8197	0	14.6717	-14.8197	-14.6717
	gi|29841300	ECLSVDQGHATNGVQHGR	-	-	1966.26	1.16573	0	13.9898	0	14.5456	-13.9898	-14.5456
	gi|1034562343	TCSTMTGPVHFTVGKSRSSAR	-	-	2267.82	0.929332	0	13.538	0	14.0175	-13.538	-14.0175
	gi|406562432	DDLMLLDVFADK	-	-	1410.66	0.435355	0	13.7976	0	13.6717	-13.7976	-13.6717
	gi|406525268	KEIANVYNPTGDVK	-	-	1547.7	2.38e-13	0	12.7835	0	13.051	-12.7835	-13.051
	Suppresed infection markers (n= 21): Suppressed in Day 1 infected cells but present in uninfected cells and restored in infected Day 5 (i.e. after clearance)
	gi|14701786	MXVEGRLLVPDR	CELF2	ENSG00000048740	1372.14	0.470946	0	15.3071	11.3527	14.8227	-15.3071	0.765897
	gi|4557323	HATKTAK	APOC3	ENSG00000110245	756.683	1.19e-13	0	14.3586	9.42486	11.5989	-14.3586	0.812565
	gi|1034561620	LVSGIPSLQIVLKSIMK	CACNA1E	ENSG00000198216	1826.88	0.855652	0	13.4127	12.2206	13.3386	-13.4127	0.916183
	gi|406527457	EGKLKKIIVTGCMAQR	-	-	1847.84	2.38e-13	0	13.207	11.8818	12.8648	-13.207	0.923588
	gi|119602485	MASSTGDRSQAVRNGLRAK	GPT	ENSG00000167701	2023.36	0.798007	0	14.6468	13.361	13.9687	-14.6468	0.956494
	gi|9844226	NKGNFPGRFSGRQXSNSR	-	-	1975.91	0.0086715	0	14.071	13.2559	13.7169	-14.071	0.966391
	gi|116283533	RLTLEGNTMNASNVAK	ZNF440	ENSG00000171295	1718.61	2.41e-13	0	13.2682	13.0825	13.4546	-13.2682	0.972344
	gi|388591629	ALAHVRYLCTQANGGKVK	-	-	1985.67	0.769859	0	15.6402	14.3162	14.6865	-15.6402	0.974782
	gi|3256191	AEVEVCRKHNQQQNHPKYSGQK	SYCP2	ENSG00000196074	2665.71	0.0191727	0	14.5773	13.5158	13.5667	-14.5773	0.99625
	gi|119600846	TKASTHAVDRLR	-	-	1351.78	0.00195229	0	14.8271	14.2932	14.3323	-14.8271	0.997267
	gi|406514858	IPSADT	-	-	602.868	0.00203981	0	13.5002	13.4277	13.438	-13.5002	0.999239
	gi|406526589	IYLATSKPLK	-	-	1132.66	0	0	10.9305	10.9975	10.8759	-10.9305	1.01117
	gi|406536297	IMGEAPGSYR	-	-	1096.02	0.243217	0	9.83707	12.4017	10.1467	-9.83707	1.22225
	gi|119619673	EAMVKLK	GOLGA6B	ENSG00000215186	819.439	1.22e-13	0	14.522	10.7103	0	-14.522	10.7103
	gi|336069353	AIREGVKMIFNKFVK	-	-	1780.3	0.571015	0	14.3174	11.1264	0	-14.3174	11.1264
	gi|371446637	EYGDSVK	-	-	796.711	0.0019957	0	11.4794	11.4964	0	-11.4794	11.4964
	gi|116242826	AGAAASR	TRIM41	ENSG00000146063	602.335	0	0	12.4437	12.0708	0	-12.4437	12.0708
	gi|336067984	VTPAHDVNDHMLGLK	-	-	1646.77	4.82e-13	0	14.3753	12.9462	0	-14.3753	12.9462
	gi|359718912	HVTSHR	-	-	736.735	1.23e-13	0	13.6191	13.5185	0	-13.6191	13.5185
	gi|119614597	NYLLESPHRFR	-	-	1431.73	0.00580333	0	13.7318	13.8529	0	-13.7318	13.8529
	gi|1034639637	VSQQGMDVALQK	GRID2	ENSG00000152208	1319.23	0	0	13.7268	13.8946	0	-13.7268	13.8946
