# Supplementary material for: Characterisation of secretome-based immune responses of human leukocytes infected with various Mycobacterium tuberculosis lineages
Source: PeerJ. 2021 Jun 3;9:e11565. doi: 10.7717/peerj.11565 (PMC8180191; doi:10.7717/peerj.11565)
Supplement: Supplemental Information 4 [file peerj-09-11565-s004.xlsx]

## Sheet: TableS4
Table S4 Colony-forming unit (CFU) assays confirming the in-vitro clearance stage.
Conditions	Day1		Day3		Day5
	Intracellular	extracellular	Intracellular	extracellular	Intracellular	extracellular
Uninfected control	No growth	No growth	No growth	No growth	No growth	No growth
Mycobacterium tuberculosis (H37Rv strain)	Growth	No growth	No growth	No growth	No growth	No growth
Mycobacterium tuberculosis (East Asian lineage)	Growth	No growth	No growth	No growth	No growth	No growth
Mycobacterium tuberculosis (Indo-Oceanic lineage)	Growth	No growth	No growth	No growth	No growth	No growth
Mycobacterium tuberculosis (Euro-American lineage)	Growth	No growth	No growth	No growth	No growth	No growth
