# Supplementary material for: Characterisation of secretome-based immune responses of human leukocytes infected with various Mycobacterium tuberculosis lineages
Source: PeerJ. 2021 Jun 3;9:e11565. doi: 10.7717/peerj.11565 (PMC8180191; doi:10.7717/peerj.11565)
Supplement: Supplemental Information 5 [file peerj-09-11565-s005.xlsx]

## Sheet: Table S5
Table S5. List of proteins expressed or suppressed during active infection and following clearance of M. tuberculosis.
Proteins expressed during initial infection
GI numbers	Peptides	Ensembl Gene IDs	Gene Symbols	Reactome Pathways
gi|1013173930	VGLTMSG	-	-	-
gi|1034560884	IIYNNLGIDEGAWMK	ENSG00000198626	RYR2	Ion channel transport; Muscle contraction; Stimuli-sensing channels; Ion homeostasis; Cardiac conduction; Transport of small molecules
gi|1034578830	GTMMR	-	-	-
gi|1034580323	FVATK	ENSG00000174718	RESF1	-
gi|1034587608	SRAQGCCAGER	-	-	-
gi|1034609680	ESILSSSPNAGSKR	ENSG00000118156	ZNF541	-
gi|1034698040	FSDPR	-	-	-
gi|10433965	MSPRVVNRMSR	ENSG00000141376	BCAS3	-
gi|1045859744	GLEWIGRIYTNGSTNYNPSLK	-	-	-
gi|112894	HFAAASGKVSPTASR	ENSG00000118503	TNFAIP3	Death Receptor Signalling; NOD1/2 Signaling Pathway; Negative regulators of DDX58/IFIH1 signaling; TNFR1-induced NFkappaB signaling pathway; Deubiquitination; Nucleotide-binding domain, leucine rich repeat containing receptor (NLR) signaling pathways; Ovarian tumor domain proteases; TNF signaling; DDX58/IFIH1-mediated induction of interferon-alpha/beta; Post-translational protein modification; Si…
gi|11514290	VTPFYAVXCNDSK	-	-	-
gi|119586278	SKFELGK	-	-
gi|119610558	DSSSAR	ENSG00000141504	SAT2	-
gi|1230899069	NLKEISDLIK	-	-	-
gi|158254420	DSLSDDGVDLKTQPVR	ENSG00000254087	LYN	CD22 mediated BCR regulation; Erythropoietin activates Phospholipase C gamma (PLCG); Erythropoietin activates STAT5; Fc epsilon receptor (FCERI) signaling; Immune System; Platelet activation, signaling and aggregation; Signaling by the B Cell Receptor (BCR); Axon guidance; CD209 (DC-SIGN) signaling; CD28 co-stimulation; EPH-Ephrin signaling; EPH-ephrin mediated repulsion of cells; EPHA-mediated g…
gi|158260215	MNSSPAGAPSPQPSR	ENSG00000101049	SGK2	Stimuli-sensing channels; Transport of small molecules; Ion channel transport
gi|1710614	YCNLMMQRRK	ENSG00000258818	RNASE4	-
gi|17402861	RYAEVDK	ENSG00000104205	SGK3	Stimuli-sensing channels; Ion channel transport; Transport of small molecules
gi|221044476	RYKGHR	ENSG00000132716	DCAF8	Neddylation; Metabolism of proteins; Post-translational protein modification
gi|23295949	FTAQXNKASQYVSLLIR	-	-	-
gi|317373419	HGTPRRLLYCQR	ENSG00000157227	MMP14	Extracellular matrix organization; Activation of Matrix Metalloproteinases; Degradation of the extracellular matrix; Collagen degradation
gi|336068135	AMGADYIIGVTVQGPPR	-	-	-
gi|34534938	GFDKIQHPFMMK	-	LOC399975	-
gi|363986532	TPGLVR	-	-	-
gi|406513587	TGRKKEVTLGVR	-	-	-
gi|406513853	YTDLVGKEVELPLTDR	-	-	-
gi|406535035	VTHAPR	-	-	-
gi|406545128	INVEPRVKR	-	-	-
gi|40977618	VVGLXIC	-	-	-
gi|55977747	GIGMGNIGPAGMGMEGIGFGINK	ENSG00000099783	HNRNPM	Signaling by Receptor Tyrosine Kinases; Metabolism of RNA; mRNA Splicing; mRNA Splicing - Major Pathway; FGFR2 alternative splicing; Signal Transduction; Processing of Capped Intron-Containing Pre-mRNA; Signaling by FGFR2; Signaling by FGFR
gi|62088522	SNCSRLSARR	-	RPL12P16	-
gi|767962174	MGINFHHPGTDNIMALNTR	ENSG00000107864	CPEB3	-
gi|768038890	YQHKNQQAK	ENSG00000147251	DOCK11	Hemostasis; Factors involved in megakaryocyte development and platelet production
gi|92098125	SKVGER	ENSG00000112851	ERBIN	Signaling by ERBB2 KD Mutants; Constitutive Signaling by Overexpressed ERBB2; Diseases of signal transduction; Resistance of ERBB2 KD mutants to afatinib; Resistance of ERBB2 KD mutants to neratinib; Signaling by ERBB2 in Cancer; Downregulation of ERBB2 signaling; Drug resistance in ERBB2 KD mutants; Drug-mediated inhibition of ERBB2 signaling; Resistance of ERBB2 KD mutants to osimertinib; Resis…
gi|97536293	LRAPSAAAMQR	ENSG00000204175	GPRIN2	-
Proteins expressed following clearance of Mtb
GI numbers	Peptides	Ensembl Gene IDs	Gene Symbols	Reactome Pathways
gi|1034572457	SAWSPELFS	-	-	-
gi|1034573119	TGAVAPLCVGAMRILANKTR	ENSG00000186174	BCL9L	Deactivation of the beta-catenin transactivating complex; Formation of the beta-catenin:TCF transactivating complex; Signaling by WNT; Signal Transduction; TCF dependent signaling in response to WNT
gi|1034632094	ESKSPGK	ENSG00000131378	RFTN1	-
gi|1034634650	AGAGK	ENSG00000280610; ENSG00000163808	KIF15	COPI-dependent Golgi-to-ER retrograde traffic; Intra-Golgi and retrograde Golgi-to-ER traffic; MHC class II antigen presentation; Immune System; Factors involved in megakaryocyte development and platelet production; Hemostasis; Kinesins; Membrane Trafficking; Adaptive Immune System; Vesicle-mediated transport; Golgi-to-ER retrograde transport
gi|1034671519	VLYSTAMESIQGPGK	-	-	-
gi|112699423	STISRDNSKNVLFLQMNSLR	-	-	-
gi|116242735	GTGSDGPR	ENSG00000179988	PSTK	Metabolism; Selenoamino acid metabolism; Metabolism of amino acids and derivatives; Selenocysteine synthesis
gi|116242826	AGAAASR	ENSG00000146063	TRIM41	Class I MHC mediated antigen processing & presentation; Immune System; Adaptive Immune System; Antigen processing: Ubiquitination & Proteasome degradation
gi|119610558	DSSSAR	ENSG00000141504	SAT2	-
gi|119614597	NYLLESPHRFR	-	-	-
gi|119619489	LVGLGLGSGEGEPR	-	-	-
gi|119619673	EAMVKLK	ENSG00000215186	GOLGA6B	-
gi|1230897427	HIGIIMDGNGR	-	-	-
gi|1230898783	DEHGK	-	-	-
gi|160113087	SSRSLTISIVAAAGRELFMTDRER	ENSG00000006611	USH1C	-
gi|181616	FGEVISYQQLAALAGNPKATR	ENSG00000170430	MGMT	MGMT-mediated DNA damage reversal; DNA Damage Reversal; DNA Repair
gi|189054582	NGVALPR	ENSG00000196116	TDRD7	-
gi|193806337	GKVLAQQGEYSEAIPILRAALK	ENSG00000105701	FKBP8	Deubiquitination; Metabolism of proteins; Ub-specific processing proteases; Post-translational protein modification
gi|21359894	KLNFQAFAELCRKR	ENSG00000274958; ENSG00000100605	ITPK1	Metabolism; Synthesis of IP3 and IP4 in the cytosol; Synthesis of pyrophosphates in the cytosol; Factors involved in megakaryocyte development and platelet production; Hemostasis; Inositol phosphate metabolism
gi|221040448	AAPRRAMDGRTPRPQDAPAR	ENSG00000082438	COBLL1	-
gi|296434481	ETEIFFQPSQGYRPPPFSEK	ENSG00000104093	DMXL2	-
gi|296452942	CATPPQLANGVTEGLDYGFMK	ENSG00000165124	SVEP1	-
gi|317373419	HGTPRRLLYCQR	ENSG00000157227	MMP14	Extracellular matrix organization; Activation of Matrix Metalloproteinases; Degradation of the extracellular matrix; Collagen degradation
gi|336069353	AIREGVKMIFNKFVK	-	-	-
gi|363985888	TAEAAEQMKRLDGK	-	-	-
gi|371446637	EYGDSVK	-	-	-
gi|406516825	KYLADMNPIEAMDFVKDR	-	-	-
gi|406525470	VTFGAYDEKNGR	-	-	-
gi|406527412	KGAFDGMLQKRR	-	-	-
gi|406533031	TAEYMAQCGVDLIIGSHPHVMQRVGK	-	-	-
gi|406534716	IFRFNPGKELK	-	-	-
gi|406538439	VPLKYIDSTPHGDIIGR	-	-	-
gi|444737927	MPSQDVSGSEDTFPNKRPR	ENSG00000010072	SPRTN	DNA Damage Bypass; Translesion synthesis by Y family DNA polymerases bypasses lesions on DNA template; DNA Repair; Translesion Synthesis by POLH
gi|530412564	IMNEEDPEKQRR	ENSG00000108588	CCDC47	-
gi|567139	LEQSGGGVVKPGGSLR	-	-	-
gi|578838219	RCPGAVVPVDLLKLAR	ENSG00000184083	FAM120C	-
gi|721363461	AEMQNCSDPMMKLLLDKK	-	-	-
gi|767962174	MGINFHHPGTDNIMALNTR	ENSG00000107864	CPEB3	-
gi|767966098	TTPSPR	ENSG00000273572; ENSG00000099834	CDHR5	-
gi|768013176	GDTSGERGLGCNELGRSLR	-	-	-
gi|768015681	FDVGPK	ENSG00000101191	DIDO1	Reproduction; Meiosis; Meiotic synapsis; Cell Cycle
gi|768038890	YQHKNQQAK	ENSG00000147251	DOCK11	Hemostasis; Factors involved in megakaryocyte development and platelet production
Proteins suppressed during initial infection
GI numbers	Peptides	Ensembl Gene IDs	Gene Symbols	Reactome Pathways
gi|1034561620	LVSGIPSLQIVLKSIMK	ENSG00000198216	CACNA1E	Integration of energy metabolism; Metabolism; Neuronal System; Regulation of insulin secretion; Presynaptic depolarization and calcium channel opening; Transmission across Chemical Synapses
gi|29841300	ECLSVDQGHATNGVQHGR	-	-	-
gi|406562432	DDLMLLDVFADK	-	-	-
gi|14701786	MXVEGRLLVPDR	ENSG00000048740	CELF2	-
gi|1034562343	TCSTMTGPVHFTVGKSRSSAR	-	-	-
gi|119602485	MASSTGDRSQAVRNGLRAK	ENSG00000167701	GPT	Alanine metabolism; Metabolism; Metabolism of amino acids and derivatives
gi|9844226	NKGNFPGRFSGRQXSNSR	-	-	-
gi|1034612731	VDFPATWYKDGQK	ENSG00000124006	OBSL1	Post-translational protein modification; Metabolism of proteins; Neddylation
gi|3256191	AEVEVCRKHNQQQNHPKYSGQK	ENSG00000196074	SYCP2	Reproduction; Meiotic synapsis; Cell Cycle; Meiosis
gi|1034639637	VSQQGMDVALQK	ENSG00000152208	GRID2	-
gi|406536297	IMGEAPGSYR	-	-	-
gi|336069353	AIREGVKMIFNKFVK	-	-	-
gi|371446637	EYGDSVK	-	-	-
gi|116242826	AGAAASR	ENSG00000146063	TRIM41	Class I MHC mediated antigen processing & presentation; Immune System; Adaptive Immune System; Antigen processing: Ubiquitination & Proteasome degradation
gi|116283533	RLTLEGNTMNASNVAK	ENSG00000171295	ZNF440	Gene expression (Transcription); Generic Transcription Pathway; RNA Polymerase II Transcription
gi|359718912	HVTSHR	-	-	-
gi|119614597	NYLLESPHRFR	-	-	-
gi|119600846	TKASTHAVDRLR	-	-	-
gi|119603680	MAGGGGSSDGSGRAAGR	ENSG00000132604	TERF2	Base-Excision Repair, AP Site Formation; DNA Damage/Telomere Stress Induced Senescence; Meiosis; Base Excision Repair; Cellular responses to stress; Depyrimidination; Meiotic synapsis; Packaging Of Telomere Ends; Chromosome Maintenance; DNA Repair; Telomere Maintenance; Recognition and association of DNA glycosylase with site containing an affected purine; Cell Cycle; Cellular responses to extern…
gi|119615828	DARVSDLKRALR	ENSG00000103248	MTHFSD	-
gi|119595630	GSWPVRAPTI	ENSG00000197114	ZGPAT	-
gi|296040431	MGIAGVVR	ENSG00000088882	CPXM1	-
gi|119619673	EAMVKLK	ENSG00000215186	GOLGA6B	-
gi|406517371	EILSTAPHAETEQPDNDDIIGK	-	-	-
gi|371445534	GRFTISRDDPR	-	-	-
gi|381142160	GLEWVSSIFSGGNVYYADSVR	-	-	-
gi|119622241	SCSHQEMQVTPMDQK	-	-	-
gi|1034603487	DLTVITR	ENSG00000187323	DCC	Caspase activation via extrinsic apoptotic signalling pathway; Role of second messengers in netrin-1 signaling; Apoptosis; Developmental Biology; Regulation of commissural axon pathfinding by SLIT and ROBO; Axon guidance; Netrin-1 signaling; Programmed Cell Death; Caspase activation via Dependence Receptors in the absence of ligand; Signaling by ROBO receptors; DCC mediated attractive signaling; …
gi|15823655	SPRTRAPAPR	ENSG00000138439	FAM117B	-
gi|336067984	VTPAHDVNDHMLGLK	-	-	-
gi|119630000	DNVKILSSD	-	-	-
gi|189054582	NGVALPR	ENSG00000196116	TDRD7	-
gi|12084271	SDDTAVYFCAGVYEGEADEGEYR	-	-	-
gi|388591629	ALAHVRYLCTQANGGKVK	-	-	-
gi|7662160	VEKKANLSFSMMGDR	ENSG00000159658	EFCAB14	-
gi|388593611	YNLMPTKSSNYGIR	-	-	-
gi|40042136	EXKSESR	-	-	-
gi|406514858	IPSADT	-	-	-
gi|194382338	EADGVHLAGEGAGPSGQPS	-	-	-
gi|406526589	IYLATSKPLK	-	-	-
gi|194375313	LQDTHSPR	ENSG00000101940	WDR13	-
gi|406527457	EGKLKKIIVTGCMAQR	-	-	-
gi|14485051	RFSDKLIFGKGTR	-	-	-
gi|68565595	LGQEEPPLMGNGWAGGGPRPPR	ENSG00000185933	CALHM1	-
gi|1230898783	DEHGK	-	-	-
gi|388592413	MILSMTGYGK	-	-	-
gi|119629562	DEGTPGLLASGLLLR	-	-	-
gi|406538439	VPLKYIDSTPHGDIIGR	-	-	-
gi|41688816	LYSRSSDRSGSCSSLSPPR	ENSG00000065526	SPEN	-
gi|406559961	SMRMGK	-	-	-
gi|93141230	CSHVEFGMWK	ENSG00000275748; ENSG00000276276; ENSG00000228696	ARL17B	-
gi|642945633	ASDITK	ENSG00000155657	TTN	Striated Muscle Contraction; Response to elevated platelet cytosolic Ca2+; Platelet activation, signaling and aggregation; Platelet degranulation; Hemostasis; Muscle contraction
gi|1027002843	ATPTIR	-	SPSK_03959	-
gi|406566009	ELTTHQR	-	-	-
gi|406545701	INEPALDLALVMALISSFK	-	-	-
gi|119579832	EQRALQVSPPT	ENSG00000183337	BCOR	-
gi|767903972	DGLSVPK	ENSG00000198912	C1orf174	-
gi|6330248	KGSAGSGAHARAGEAK	ENSG00000204851	PNMA8B	-
gi|4557323	HATKTAK	ENSG00000110245	APOC3	Signaling by GPCR; Visual phototransduction; Metabolism; Plasma lipoprotein remodeling; Signal Transduction; Transport of small molecules; Chylomicron assembly; HDL remodeling; Plasma lipoprotein assembly, remodeling, and clearance; Chylomicron remodeling; Metabolism of vitamins and cofactors; Plasma lipoprotein assembly; Retinoid metabolism and transport; GPCR downstream signalling; Metabolism o…
gi|530381741	HDPSTT	ENSG00000137393	RNF144B	Adaptive Immune System; Class I MHC mediated antigen processing & presentation; Antigen processing: Ubiquitination & Proteasome degradation; Immune System
gi|1034565917	GFTPVVDDPVTER	ENSG00000078114	NEBL	-
gi|119575651	NETMEHNRTRGPVELR	-	-	-
gi|612405394	LMIYEVSKRPSGIPDRFSGSK	-	-	-
gi|336068211	GRFPDISNGR	-	-	-
gi|902380326	IWSHGGR	-	-	-
gi|1230897427	HIGIIMDGNGR	-	-	-
gi|1034643921	MLIAASYGNVISIFEPVNLPK	ENSG00000172869	DMXL1	-
