# Supplementary material for: Characterisation of secretome-based immune responses of human leukocytes infected with various Mycobacterium tuberculosis lineages
Source: PeerJ. 2021 Jun 3;9:e11565. doi: 10.7717/peerj.11565 (PMC8180191; doi:10.7717/peerj.11565)
Supplement: Supplemental Information 6 [file peerj-09-11565-s006.xlsx]

## Sheet: Table S6
Table S6. List of top ten pathway associated with proteins expressed or suppressed during active infection and following clearance of M. tuberculosis.
Pathway of proteins expressed during initial infection
Pathway	Hits	P-values
Gene Expression	101	3.02e-11
Metabolism of RNA	53	2.3e-14
Metabolism of mRNA	49	3.92e-13
Hemostasis	48	1e-05
Nonsense Mediated Decay Enhanced by the Exon Junction Complex	42	6.91e-16
Nonsense-Mediated Decay	42	6.91e-16
Translation	41	4.97e-12
Eukaryotic Translation Initiation	40	5.72e-14
Cap-dependent Translation Initiation	40	5.72e-14
SRP-dependent cotranslational protein targeting to membrane	39	1.26e-13
Pathway of proteins expressed following clearance of Mtb
Pathway	Hits	P-values
Signal Transduction	52	5.81e-06
Adaptive Immune System	46	1.39e-17
Gene Expression	42	2.06e-07
Cell Cycle	41	1.15e-17
Disease	41	1.15e-08
Metabolism	40	0.00236
Cell Cycle, Mitotic	37	1.98e-17
Downstream Signaling Events Of B Cell Receptor (BCR)	36	8.33e-30
Signaling by the B Cell Receptor (BCR)	36	1.61e-27
Antigen processing: Ubiquitination & Proteasome degradation	36	1.25e-25
Pathway of proteins suppressed during initial infection
Pathway	Hits	P-values
Adaptive Immune System	35	1.51e-17
Innate Immune System	29	1.09e-14
Class I MHC mediated antigen processing & presentation	23	1.3e-15
Developmental Biology	23	1.78e-11
Antigen processing: Ubiquitination & Proteasome degradation	22	3.83e-16
Cytokine Signaling in Immune system	20	7e-12
Axon guidance	20	1.03e-11
Signalling by NGF	15	2.61e-07
Fcgamma receptor (FCGR) dependent phagocytosis	14	1.55e-13
NGF signalling via TRKA from the plasma membrane	14	2.47e-08
