# Supplementary material for: Characterisation of secretome-based immune responses of human leukocytes infected with various Mycobacterium tuberculosis lineages
Source: PeerJ. 2021 Jun 3;9:e11565. doi: 10.7717/peerj.11565 (PMC8180191; doi:10.7717/peerj.11565)
Supplement: Supplemental Information 7 [file peerj-09-11565-s007.xlsx]

## Sheet: Table S7
Table S7 List of proteins detected during active infection of leukocytes with strains representing several lineages of M. tuberculosis.
East-Asian (EA) lineage	GI numbers	Peptides	Ensembl Gene IDs	Gene Symbols	Reactome Pathways
	gi|119586278	SKFELGK	-	-
	gi|336068135	AMGADYIIGVTVQGPPR	-	-	-
	gi|158254420	DSLSDDGVDLKTQPVR	ENSG00000254087	LYN	CD22 mediated BCR regulation; Erythropoietin activates Phospholipase C gamma (PLCG); Erythropoietin activates STAT5; Fc epsilon receptor (FCERI) signaling; Immune System; Platelet activation, signaling and aggregation; Signaling by the B Cell Receptor (BCR); Axon guidance; CD209 (DC-SIGN) signaling; CD28 co-stimulation; EPH-Ephrin signaling; EPH-ephrin mediated repulsion of cells; EPHA-mediated g…
	gi|1034560884	IIYNNLGIDEGAWMK	ENSG00000198626	RYR2	Ion channel transport; Muscle contraction; Stimuli-sensing channels; Ion homeostasis; Cardiac conduction; Transport of small molecules
	gi|11514290	VTPFYAVXCNDSK	-	-	-
	gi|363986532	TPGLVR	-	-	-
	gi|221044476	RYKGHR	ENSG00000132716	DCAF8	Neddylation; Metabolism of proteins; Post-translational protein modification
	gi|1034587608	SRAQGCCAGER	-	-	-
	gi|406513587	TGRKKEVTLGVR	-	-	-
	gi|62088522	SNCSRLSARR	-	RPL12P16	-
	gi|406535035	VTHAPR	-	-	-
	gi|406545128	INVEPRVKR	-	-	-
	gi|1034698040	FSDPR	-	-	-
	gi|17402861	RYAEVDK	ENSG00000104205	SGK3	Stimuli-sensing channels; Ion channel transport; Transport of small molecules
	gi|1034609680	ESILSSSPNAGSKR	ENSG00000118156	ZNF541	-
	gi|1710614	YCNLMMQRRK	ENSG00000258818	RNASE4	-
	gi|114152287	RPGPSPEALLEEGSPTMVEK	ENSG00000074855	ANO8	Post-translational protein modification; Regulation of Insulin-like Growth Factor (IGF) transport and uptake by Insulin-like Growth Factor Binding Proteins (IGFBPs); Stimuli-sensing channels; Post-translational protein phosphorylation; Ion channel transport; Transport of small molecules; Metabolism of proteins
	gi|1034573119	TGAVAPLCVGAMRILANKTR	ENSG00000186174	BCL9L	Deactivation of the beta-catenin transactivating complex; Formation of the beta-catenin:TCF transactivating complex; Signaling by WNT; Signal Transduction; TCF dependent signaling in response to WNT
	gi|1034659687	QVNGQQGGGSEPAAAAAVVAAGDK	-	-	-
	gi|3122050	AVATGKMDENQFVAVTSTNAAK	ENSG00000113657	DPYSL3	Axon guidance; Developmental Biology; Semaphorin interactions; CRMPs in Sema3A signaling
	gi|767908344	TPDMIQQPRAPLGNTVLPR	ENSG00000163239	TDRD10	-
	gi|1045859744	GLEWIGRIYTNGSTNYNPSLK	-	-	-
	gi|55977747	GIGMGNIGPAGMGMEGIGFGINK	ENSG00000099783	HNRNPM	Signaling by Receptor Tyrosine Kinases; Metabolism of RNA; mRNA Splicing; mRNA Splicing - Major Pathway; FGFR2 alternative splicing; Signal Transduction; Processing of Capped Intron-Containing Pre-mRNA; Signaling by FGFR2; Signaling by FGFR
	gi|119610558	DSSSAR	ENSG00000141504	SAT2	-
	gi|296434448	AREMPGVWGAGGSLK	ENSG00000148337	CIZ1	-
	gi|406516122	IKQGMMEELLTGKVR	-	-	-
	gi|74732608	VVFKDGFK	ENSG00000183773	AIFM3	-
	gi|119602139	GHIPQQDSNSLCR	-	-	-
	gi|298286816	IQVQPMVDPK	ENSG00000183354	KIAA2026	-
Indo-Oceanic (IO) lineage	gi|1045859744	GLEWIGRIYTNGSTNYNPSLK	-	-	-
	gi|119610558	DSSSAR	ENSG00000141504	SAT2	-
	gi|317373419	HGTPRRLLYCQR	ENSG00000157227	MMP14	Extracellular matrix organization; Activation of Matrix Metalloproteinases; Degradation of the extracellular matrix; Collagen degradation
	gi|55977747	GIGMGNIGPAGMGMEGIGFGINK	ENSG00000099783	HNRNPM	Signaling by Receptor Tyrosine Kinases; Metabolism of RNA; mRNA Splicing; mRNA Splicing - Major Pathway; FGFR2 alternative splicing; Signal Transduction; Processing of Capped Intron-Containing Pre-mRNA; Signaling by FGFR2; Signaling by FGFR
	gi|406535035	VTHAPR	-	-	-
	gi|363986532	TPGLVR	-	-	-
	gi|11514290	VTPFYAVXCNDSK	-	-	-
	gi|1034560884	IIYNNLGIDEGAWMK	ENSG00000198626	RYR2	Ion channel transport; Muscle contraction; Stimuli-sensing channels; Ion homeostasis; Cardiac conduction; Transport of small molecules
	gi|1034587608	SRAQGCCAGER	-	-	-
	gi|10433965	MSPRVVNRMSR	ENSG00000141376	BCAS3	-
	gi|23295949	FTAQXNKASQYVSLLIR	-	-	-
	gi|406513853	YTDLVGKEVELPLTDR	-	-	-
	gi|97536293	LRAPSAAAMQR	ENSG00000204175	GPRIN2	-
	gi|1710614	YCNLMMQRRK	ENSG00000258818	RNASE4	-
	gi|1034609680	ESILSSSPNAGSKR	ENSG00000118156	ZNF541	-
	gi|17402861	RYAEVDK	ENSG00000104205	SGK3	Stimuli-sensing channels; Ion channel transport; Transport of small molecules
	gi|1034698040	FSDPR	-	-	-
	gi|1013173930	VGLTMSG	-	-	-
	gi|62088522	SNCSRLSARR	-	RPL12P16	-
	gi|406545128	INVEPRVKR	-	-	-
	gi|158260215	MNSSPAGAPSPQPSR	ENSG00000101049	SGK2	Stimuli-sensing channels; Transport of small molecules; Ion channel transport
	gi|119586278	SKFELGK	-	-	-
	gi|406516122	IKQGMMEELLTGKVR	-	-	-
	gi|40977618	VVGLXIC	-	-	-
	gi|296434448	AREMPGVWGAGGSLK	ENSG00000148337	CIZ1	-
	gi|767908344	TPDMIQQPRAPLGNTVLPR	ENSG00000163239	TDRD10	-
	gi|3122050	AVATGKMDENQFVAVTSTNAAK	ENSG00000113657	DPYSL3	Axon guidance; Developmental Biology; Semaphorin interactions; CRMPs in Sema3A signaling
	gi|1034659687	QVNGQQGGGSEPAAAAAVVAAGDK	-	-	-
	gi|114152287	RPGPSPEALLEEGSPTMVEK	ENSG00000074855	ANO8	Post-translational protein modification; Regulation of Insulin-like Growth Factor (IGF) transport and uptake by Insulin-like Growth Factor Binding Proteins (IGFBPs); Stimuli-sensing channels; Post-translational protein phosphorylation; Ion channel transport; Transport of small molecules; Metabolism of proteins
	gi|119602139	GHIPQQDSNSLCR	-	-	-
	gi|298286816	IQVQPMVDPK	ENSG00000183354	KIAA2026	-
Euro-American (EuA) lineage	gi|40977618	VVGLXIC	-	-	-
	gi|767962174	MGINFHHPGTDNIMALNTR	ENSG00000107864	CPEB3	-
	gi|768038890	YQHKNQQAK	ENSG00000147251	DOCK11	Hemostasis; Factors involved in megakaryocyte development and platelet production
	gi|11514290	VTPFYAVXCNDSK	-	-	-
	gi|336068135	AMGADYIIGVTVQGPPR	-	-	-
	gi|406513853	YTDLVGKEVELPLTDR	-	-	-
	gi|406535035	VTHAPR	-	-	-
	gi|62088522	SNCSRLSARR	-	RPL12P16	-
	gi|1034560884	IIYNNLGIDEGAWMK	ENSG00000198626	RYR2	Ion channel transport; Muscle contraction; Stimuli-sensing channels; Ion homeostasis; Cardiac conduction; Transport of small molecules
	gi|363986532	TPGLVR	-	-	-
	gi|34534938	GFDKIQHPFMMK	-	LOC399975	-
	gi|23295949	FTAQXNKASQYVSLLIR	-	-	-
	gi|17402861	RYAEVDK	ENSG00000104205	SGK3	Stimuli-sensing channels; Ion channel transport; Transport of small molecules
	gi|1034580323	FVATK	ENSG00000174718	RESF1	-
	gi|1034587608	SRAQGCCAGER	-	-	-
	gi|119586278	SKFELGK	-	-	-
	gi|768015681	FDVGPK	ENSG00000101191	DIDO1	Reproduction; Meiosis; Meiotic synapsis; Cell Cycle
	gi|578838219	RCPGAVVPVDLLKLAR	ENSG00000184083	FAM120C	-
	gi|406516122	IKQGMMEELLTGKVR	-	-	-
	gi|296434448	AREMPGVWGAGGSLK	ENSG00000148337	CIZ1	-
	gi|55977747	GIGMGNIGPAGMGMEGIGFGINK	ENSG00000099783	HNRNPM	Signaling by Receptor Tyrosine Kinases; Metabolism of RNA; mRNA Splicing; mRNA Splicing - Major Pathway; FGFR2 alternative splicing; Signal Transduction; Processing of Capped Intron-Containing Pre-mRNA; Signaling by FGFR2; Signaling by FGFR
	gi|767908344	TPDMIQQPRAPLGNTVLPR	ENSG00000163239	TDRD10	-
	gi|1034659687	QVNGQQGGGSEPAAAAAVVAAGDK	-	-	-
	gi|296434481	ETEIFFQPSQGYRPPPFSEK	ENSG00000104093	DMXL2	-
	gi|1045859744	GLEWIGRIYTNGSTNYNPSLK	-	-	-
	gi|3122050	AVATGKMDENQFVAVTSTNAAK	ENSG00000113657	DPYSL3	Axon guidance; Developmental Biology; Semaphorin interactions; CRMPs in Sema3A signaling
	gi|1034573119	TGAVAPLCVGAMRILANKTR	ENSG00000186174	BCL9L	Deactivation of the beta-catenin transactivating complex; Formation of the beta-catenin:TCF transactivating complex; Signaling by WNT; Signal Transduction; TCF dependent signaling in response to WNT
	gi|114152287	RPGPSPEALLEEGSPTMVEK	ENSG00000074855	ANO8	Post-translational protein modification; Regulation of Insulin-like Growth Factor (IGF) transport and uptake by Insulin-like Growth Factor Binding Proteins (IGFBPs); Stimuli-sensing channels; Post-translational protein phosphorylation; Ion channel transport; Transport of small molecules; Metabolism of proteins
	gi|119602139	GHIPQQDSNSLCR	-	-	-
	gi|74732608	VVFKDGFK	ENSG00000183773	AIFM3	-
	gi|298286816	IQVQPMVDPK	ENSG00000183354	KIAA2026	-
	gi|40046736	XSVKSSFSYLQGKNYQNTMN	-	-	-
H37Rv strain	gi|1230899069	NLKEISDLIK	-	-	-
	gi|1034587608	SRAQGCCAGER	-	-	-
	gi|92098125	SKVGER	ENSG00000112851	ERBIN	Signaling by ERBB2 KD Mutants; Constitutive Signaling by Overexpressed ERBB2; Diseases of signal transduction; Resistance of ERBB2 KD mutants to afatinib; Resistance of ERBB2 KD mutants to neratinib; Signaling by ERBB2 in Cancer; Downregulation of ERBB2 signaling; Drug resistance in ERBB2 KD mutants; Drug-mediated inhibition of ERBB2 signaling; Resistance of ERBB2 KD mutants to osimertinib; Resis…
	gi|34534938	GFDKIQHPFMMK	-	LOC399975	-
	gi|1034560884	IIYNNLGIDEGAWMK	ENSG00000198626	RYR2	Ion channel transport; Muscle contraction; Stimuli-sensing channels; Ion homeostasis; Cardiac conduction; Transport of small molecules
	gi|1034580323	FVATK	ENSG00000174718	RESF1	-
	gi|406535035	VTHAPR	-	-	-
	gi|336068135	AMGADYIIGVTVQGPPR	-	-	-
	gi|10433965	MSPRVVNRMSR	ENSG00000141376	BCAS3	-
	gi|62088522	SNCSRLSARR	-	RPL12P16	-
	gi|1710614	YCNLMMQRRK	ENSG00000258818	RNASE4	-
	gi|1013173930	VGLTMSG	-	-	-
	gi|221044476	RYKGHR	ENSG00000132716	DCAF8	Neddylation; Metabolism of proteins; Post-translational protein modification
	gi|112894	HFAAASGKVSPTASR	ENSG00000118503	TNFAIP3	Death Receptor Signalling; NOD1/2 Signaling Pathway; Negative regulators of DDX58/IFIH1 signaling; TNFR1-induced NFkappaB signaling pathway; Deubiquitination; Nucleotide-binding domain, leucine rich repeat containing receptor (NLR) signaling pathways; Ovarian tumor domain proteases; TNF signaling; DDX58/IFIH1-mediated induction of interferon-alpha/beta; Post-translational protein modification; Si…
	gi|17402861	RYAEVDK	ENSG00000104205	SGK3	Stimuli-sensing channels; Ion channel transport; Transport of small molecules
	gi|1034578830	GTMMR	-	-	-
	gi|119586278	SKFELGK	-	-	-
	gi|406516122	IKQGMMEELLTGKVR	-	-	-
	gi|119610558	DSSSAR	ENSG00000141504	SAT2	-
	gi|767908344	TPDMIQQPRAPLGNTVLPR	ENSG00000163239	TDRD10	-
	gi|296434448	AREMPGVWGAGGSLK	ENSG00000148337	CIZ1	-
	gi|55977747	GIGMGNIGPAGMGMEGIGFGINK	ENSG00000099783	HNRNPM	Signaling by Receptor Tyrosine Kinases; Metabolism of RNA; mRNA Splicing; mRNA Splicing - Major Pathway; FGFR2 alternative splicing; Signal Transduction; Processing of Capped Intron-Containing Pre-mRNA; Signaling by FGFR2; Signaling by FGFR
	gi|1045859744	GLEWIGRIYTNGSTNYNPSLK	-	-	-
	gi|3122050	AVATGKMDENQFVAVTSTNAAK	ENSG00000113657	DPYSL3	Axon guidance; Developmental Biology; Semaphorin interactions; CRMPs in Sema3A signaling
	gi|1034659687	QVNGQQGGGSEPAAAAAVVAAGDK	-	-	-
	gi|114152287	RPGPSPEALLEEGSPTMVEK	ENSG00000074855	ANO8	Post-translational protein modification; Regulation of Insulin-like Growth Factor (IGF) transport and uptake by Insulin-like Growth Factor Binding Proteins (IGFBPs); Stimuli-sensing channels; Post-translational protein phosphorylation; Ion channel transport; Transport of small molecules; Metabolism of proteins
	gi|74732608	VVFKDGFK	ENSG00000183773	AIFM3	-
	gi|119602139	GHIPQQDSNSLCR	-	-	-
	gi|51701343	WQDIQNDPRYMILNEPFK	ENSG00000116254	CHD5	-
	gi|147744602	GIGSRLLTKMGYEFGKGLGR	ENSG00000197114	ZGPAT	-
	gi|298286816	IQVQPMVDPK	ENSG00000183354	KIAA2026	-
	gi|40046736	XSVKSSFSYLQGKNYQNTMN	-	-	-
	gi|119631528	QLCQKPSDSPASTPQAKWRR	-	-	-
	gi|519672992	DLRGCGSSASCYGMDVWGR	-	-	-
	gi|20138952	MQGIKMLGELLEESQMEATR	ENSG00000145901	TNIP1	Deubiquitination; Metabolism of proteins; Post-translational protein modification; Ovarian tumor domain proteases
	gi|119618300	DLGGDRGRACDGSGLSASAGLGK	-	-	-
	gi|42558478	QGDTAVYAEMVSYENQAKYR	ENSG00000249715	FER1L5	-
