# Supplementary material for: Characterisation of secretome-based immune responses of human leukocytes infected with various Mycobacterium tuberculosis lineages
Source: PeerJ. 2021 Jun 3;9:e11565. doi: 10.7717/peerj.11565 (PMC8180191; doi:10.7717/peerj.11565)
Supplement: Supplemental Information 8 [file peerj-09-11565-s008.xlsx]

## Sheet: Table S8
Table S8 List of proteins suppressed during active infection of leukocytes with strains representing several lineages of M. tuberculosis.
East-Asian (EA) lineage	GI numbers	Peptides	Ensembl Gene IDs	Gene Symbols	Reactome Pathways
	gi|1034612731	VDFPATWYKDGQK	ENSG00000124006	OBSL1	Post-translational protein modification; Metabolism of proteins; Neddylation
	gi|119600846	TKASTHAVDRLR	-	-	-
	gi|1034562343	TCSTMTGPVHFTVGKSRSSAR	-	-	-
	gi|119603680	MAGGGGSSDGSGRAAGR	ENSG00000132604	TERF2	Base-Excision Repair, AP Site Formation; DNA Damage/Telomere Stress Induced Senescence; Meiosis; Base Excision Repair; Cellular responses to stress; Depyrimidination; Meiotic synapsis; Packaging Of Telomere Ends; Chromosome Maintenance; DNA Repair; Telomere Maintenance; Recognition and association of DNA glycosylase with site containing an affected purine; Cell Cycle; Cellular responses to extern…
	gi|116283533	RLTLEGNTMNASNVAK	ENSG00000171295	ZNF440	Gene expression (Transcription); Generic Transcription Pathway; RNA Polymerase II Transcription
	gi|902380326	IWSHGGR	-	-	-
	gi|119595630	GSWPVRAPTI	ENSG00000197114	ZGPAT	-
	gi|406530267	IAVDYIKQFDKYSAQGK	-	-	-
	gi|296040431	MGIAGVVR	ENSG00000088882	CPXM1	-
	gi|119622241	SCSHQEMQVTPMDQK	-	-	-
	gi|406517371	EILSTAPHAETEQPDNDDIIGK	-	-	-
	gi|1034561620	LVSGIPSLQIVLKSIMK	ENSG00000198216	CACNA1E	Integration of energy metabolism; Metabolism; Neuronal System; Regulation of insulin secretion; Presynaptic depolarization and calcium channel opening; Transmission across Chemical Synapses
	gi|371445534	GRFTISRDDPR	-	-	-
	gi|381142160	GLEWVSSIFSGGNVYYADSVR	-	-	-
	gi|406566009	ELTTHQR	-	-	-
	gi|1034603487	DLTVITR	ENSG00000187323	DCC	Caspase activation via extrinsic apoptotic signalling pathway; Role of second messengers in netrin-1 signaling; Apoptosis; Developmental Biology; Regulation of commissural axon pathfinding by SLIT and ROBO; Axon guidance; Netrin-1 signaling; Programmed Cell Death; Caspase activation via Dependence Receptors in the absence of ligand; Signaling by ROBO receptors; DCC mediated attractive signaling; …
	gi|406526589	IYLATSKPLK	-	-	-
	gi|530381741	HDPSTT	ENSG00000137393	RNF144B	Adaptive Immune System; Class I MHC mediated antigen processing & presentation; Antigen processing: Ubiquitination & Proteasome degradation; Immune System
	gi|4557323	HATKTAK	ENSG00000110245	APOC3	Signaling by GPCR; Visual phototransduction; Metabolism; Plasma lipoprotein remodeling; Signal Transduction; Transport of small molecules; Chylomicron assembly; HDL remodeling; Plasma lipoprotein assembly, remodeling, and clearance; Chylomicron remodeling; Metabolism of vitamins and cofactors; Plasma lipoprotein assembly; Retinoid metabolism and transport; GPCR downstream signalling; Metabolism o…
	gi|388591629	ALAHVRYLCTQANGGKVK	-	-	-
	gi|612405394	LMIYEVSKRPSGIPDRFSGSK	-	-	-
	gi|119630000	DNVKILSSD	-	-	-
	gi|189054582	NGVALPR	ENSG00000196116	TDRD7	-
	gi|12084271	SDDTAVYFCAGVYEGEADEGEYR	-	-	-
	gi|119615828	DARVSDLKRALR	ENSG00000103248	MTHFSD	-
	gi|388593611	YNLMPTKSSNYGIR	-	-	-
	gi|1034639637	VSQQGMDVALQK	ENSG00000152208	GRID2
	gi|336067984	VTPAHDVNDHMLGLK	-	-
Indo-Oceanic (IO) lineage	gi|7662160	VEKKANLSFSMMGDR	ENSG00000159658	EFCAB14	-
	gi|530381741	HDPSTT	ENSG00000137393	RNF144B	Adaptive Immune System; Class I MHC mediated antigen processing & presentation; Antigen processing: Ubiquitination & Proteasome degradation; Immune System
	gi|1034562343	TCSTMTGPVHFTVGKSRSSAR	-	-	-
	gi|1034561620	LVSGIPSLQIVLKSIMK	ENSG00000198216	CACNA1E	Integration of energy metabolism; Metabolism; Neuronal System; Regulation of insulin secretion; Presynaptic depolarization and calcium channel opening; Transmission across Chemical Synapses
	gi|119622241	SCSHQEMQVTPMDQK	-	-	-
	gi|406525268	KEIANVYNPTGDVK	-	-	-
	gi|406530267	IAVDYIKQFDKYSAQGK	-	-	-
	gi|406559961	SMRMGK	-	-	-
	gi|119600846	TKASTHAVDRLR	-	-	-
	gi|194382338	EADGVHLAGEGAGPSGQPS	-	-	-
	gi|406566009	ELTTHQR	-	-	-
	gi|194375313	LQDTHSPR	ENSG00000101940	WDR13	-
	gi|40042136	EXKSESR	-	-	-
	gi|15823655	SPRTRAPAPR	ENSG00000138439	FAM117B	-
	gi|14485051	RFSDKLIFGKGTR	-	-	-
	gi|68565595	LGQEEPPLMGNGWAGGGPRPPR	ENSG00000185933	CALHM1	-
	gi|119619673	EAMVKLK	ENSG00000215186	GOLGA6B	-
	gi|1230898783	DEHGK	-	-	-
	gi|388592413	MILSMTGYGK	-	-	-
	gi|119629562	DEGTPGLLASGLLLR	-	-	-
	gi|406538439	VPLKYIDSTPHGDIIGR	-	-	-
	gi|119615828	DARVSDLKRALR	ENSG00000103248	MTHFSD	-
	gi|388593611	YNLMPTKSSNYGIR	-	-	-
Euro-American (EuA) lineage	gi|41688816	LYSRSSDRSGSCSSLSPPR	ENSG00000065526	SPEN	-
	gi|406559961	SMRMGK	-	-	-
	gi|1034612731	VDFPATWYKDGQK	ENSG00000124006	OBSL1	Post-translational protein modification; Metabolism of proteins; Neddylation
	gi|93141230	CSHVEFGMWK	ENSG00000275748; ENSG00000276276; ENSG00000228696	ARL17B	-
	gi|642945633	ASDITK	ENSG00000155657	TTN	Striated Muscle Contraction; Response to elevated platelet cytosolic Ca2+; Platelet activation, signaling and aggregation; Platelet degranulation; Hemostasis; Muscle contraction
	gi|1027002843	ATPTIR	-	SPSK_03959	-
	gi|406527457	EGKLKKIIVTGCMAQR	-	-	-
	gi|406545701	INEPALDLALVMALISSFK	-	-	-
	gi|119579832	EQRALQVSPPT	ENSG00000183337	BCOR	-
	gi|767903972	DGLSVPK	ENSG00000198912	C1orf174	-
	gi|1034561620	LVSGIPSLQIVLKSIMK	ENSG00000198216	CACNA1E	Integration of energy metabolism; Metabolism; Neuronal System; Regulation of insulin secretion; Presynaptic depolarization and calcium channel opening; Transmission across Chemical Synapses
	gi|6330248	KGSAGSGAHARAGEAK	ENSG00000204851	PNMA8B	-
	gi|116283533	RLTLEGNTMNASNVAK	ENSG00000171295	ZNF440	Gene expression (Transcription); Generic Transcription Pathway; RNA Polymerase II Transcription
	gi|902380326	IWSHGGR	-	-	-
	gi|40042136	EXKSESR	-	-	-
	gi|1034565917	GFTPVVDDPVTER	ENSG00000078114	NEBL	-
	gi|406514858	IPSADT	-	-	-
	gi|530381741	HDPSTT	ENSG00000137393	RNF144B	Adaptive Immune System; Class I MHC mediated antigen processing & presentation; Antigen processing: Ubiquitination & Proteasome degradation; Immune System
	gi|119575651	NETMEHNRTRGPVELR	-	-	-
	gi|388591629	ALAHVRYLCTQANGGKVK	-	-	-
	gi|336068211	GRFPDISNGR	-	-	-
	gi|15823655	SPRTRAPAPR	ENSG00000138439	FAM117B	-
	gi|612405394	LMIYEVSKRPSGIPDRFSGSK	-	-	-
	gi|1230897427	HIGIIMDGNGR	-	-	-
	gi|1034643921	MLIAASYGNVISIFEPVNLPK	ENSG00000172869	DMXL1	-
	gi|336067984	VTPAHDVNDHMLGLK	-	-	-
H37Rv strain	gi|1034612731	VDFPATWYKDGQK	ENSG00000124006	OBSL1	Post-translational protein modification; Metabolism of proteins; Neddylation
	gi|29841300	ECLSVDQGHATNGVQHGR	-	-	-
	gi|1034562343	TCSTMTGPVHFTVGKSRSSAR	-	-	-
	gi|406562432	DDLMLLDVFADK	-	-	-
	gi|406525268	KEIANVYNPTGDVK	-	-	-
	gi|14701786	MXVEGRLLVPDR	ENSG00000048740	CELF2	-
	gi|4557323	HATKTAK	ENSG00000110245	APOC3	Signaling by GPCR; Visual phototransduction; Metabolism; Plasma lipoprotein remodeling; Signal Transduction; Transport of small molecules; Chylomicron assembly; HDL remodeling; Plasma lipoprotein assembly, remodeling, and clearance; Chylomicron remodeling; Metabolism of vitamins and cofactors; Plasma lipoprotein assembly; Retinoid metabolism and transport; GPCR downstream signalling; Metabolism o…
	gi|1034561620	LVSGIPSLQIVLKSIMK	ENSG00000198216	CACNA1E	Integration of energy metabolism; Metabolism; Neuronal System; Regulation of insulin secretion; Presynaptic depolarization and calcium channel opening; Transmission across Chemical Synapses
	gi|406527457	EGKLKKIIVTGCMAQR	-	-	-
	gi|119602485	MASSTGDRSQAVRNGLRAK	ENSG00000167701	GPT	Alanine metabolism; Metabolism; Metabolism of amino acids and derivatives
	gi|9844226	NKGNFPGRFSGRQXSNSR	-	-	-
	gi|116283533	RLTLEGNTMNASNVAK	ENSG00000171295	ZNF440	Gene expression (Transcription); Generic Transcription Pathway; RNA Polymerase II Transcription
	gi|388591629	ALAHVRYLCTQANGGKVK	-	-	-
	gi|3256191	AEVEVCRKHNQQQNHPKYSGQK	ENSG00000196074	SYCP2	Reproduction; Meiotic synapsis; Cell Cycle; Meiosis
	gi|119600846	TKASTHAVDRLR	-	-	-
	gi|406514858	IPSADT	-	-	-
	gi|406526589	IYLATSKPLK	-	-	-
	gi|406536297	IMGEAPGSYR	-	-	-
	gi|119619673	EAMVKLK	ENSG00000215186	GOLGA6B	-
	gi|336069353	AIREGVKMIFNKFVK	-	-	-
	gi|371446637	EYGDSVK	-	-	-
	gi|116242826	AGAAASR	ENSG00000146063	TRIM41	Class I MHC mediated antigen processing & presentation; Immune System; Adaptive Immune System; Antigen processing: Ubiquitination & Proteasome degradation
	gi|336067984	VTPAHDVNDHMLGLK	-	-	-
	gi|359718912	HVTSHR	-	-	-
	gi|119614597	NYLLESPHRFR	-	-	-
	gi|1034639637	VSQQGMDVALQK	ENSG00000152208	GRID2	-
