# Supplementary material for: Characterisation of secretome-based immune responses of human leukocytes infected with various Mycobacterium tuberculosis lineages
Source: PeerJ. 2021 Jun 3;9:e11565. doi: 10.7717/peerj.11565 (PMC8180191; doi:10.7717/peerj.11565)
Supplement: Supplemental Information 9 [file peerj-09-11565-s009.xlsx]

## Sheet: Table S9
Table S9 Pathway analysis among immune-cell types during active infection and following clearance of M. tuberculosis.
Mycobacterium tuberculosis
Cell types	Infection stage			Clearance stage
	Pathways	Hits	P-values	Pathways	Hits	P-values
Macrophage	Mitotic Telophase/Cytokinesis	2	0.0016	NADPH regeneration	1	0.00629
	Signaling by EGFR	4	0.00702	Abnormal conversion of 2-oxoglutarate to 2-hydroxyglutarate	1	0.00629
	PI3K events in ERBB4 signaling	3	0.00974	Interferon gamma signaling	3	0.011
	PIP3 activates AKT signaling	3	0.00974	Role of phospholipids in phagocytosis	2	0.0123
	PI-3K cascade	3	0.00974	Hemostasis	8	0.0129
Dendritic cells	Processing of Capped Intron-Containing Pre-mRNA	27	5.02e-06	Interferon Signaling	45	2.05e-14
	Signaling by Interleukins	23	0.000227	Cytokine Signaling in Immune system	55	1.73e-11
	Generation of Second Messengers	10	0.000345	Interferon alpha/beta signaling	24	2.8e-11
	Cell Cycle, Mitotic	57	0.000566	Immune System	140	4.39e-11
	Gene Expression	127	0.000695	Antiviral mechanism by IFN-stimulated genes	19	3.18e-07
Neutrophil	Cohesin Loading onto Chromatin	6	2.09e-08	Cytokine Signaling in Immune system	29	9.17e-10
	Signaling by Interleukins	15	3.03e-08	Interferon Signaling	19	2.64e-07
	Mitotic Telophase/Cytokinesis	6	2.78e-07	Antiviral mechanism by IFN-stimulated genes	11	2.6e-06
	Interleukin-3, 5 and GM-CSF signaling	9	1.39e-06	ISG15 antiviral mechanism	11	2.6e-06
	Establishment of Sister Chromatid Cohesion	5	2.08e-06	Interferon alpha/beta signaling	10	1.58e-05
regulatory T cells	Adaptive Immune System	91	1.13e-08	Cell Cycle	70	6.33e-14
	Immune System	134	1.2e-07	Mitotic M-M/G1 phases	44	1.2e-11
	Antigen processing-Cross presentation	19	5.58e-06	MHC class II antigen presentation	26	4.51e-10
	mRNA Splicing - Major Pathway	24	6.32e-06	Mitotic Prometaphase	24	5.29e-08
	Class I MHC mediated antigen processing & presentation	42	7.22e-06	Mitotic G1-G1/S phases	25	8.93e-08
B cells	Cell Cycle, Mitotic	128	2.86e-32	COPI Mediated Transport	3	0.000533
	Cell Cycle	145	5.18e-32	Centrosome maturation	7	0.000621
	Mitotic M-M/G1 phases	88	3.73e-24	Recruitment of mitotic centrosome proteins and complexes	7	0.000621
	M Phase	71	2.27e-17	Activation of BH3-only proteins	4	0.000658
	S Phase	48	5.41e-17	Antigen Presentation: Folding, assembly and peptide loading of class I MHC	4	0.000773
